# Supplementary material
Source: ML conference proceedings conference paper supplement (https://openreview.net/forum?id=3qoQ6AolAz)
Supplement: supplementary_material [file attachment]

---

# ● Mars: Situated Inductive Reasoning in an Open-World Environment

---

Anonymous Author(s)

Affiliation

Address

email

<https://github.com/XiaojuanTang/Mars>

## Abstract

1 Large Language Models (LLMs) trained on massive corpora have shown remark-  
2 able success in knowledge-intensive tasks. Yet, most of them rely on pre-stored  
3 knowledge. Inducing new general knowledge from a specific environment and  
4 performing reasoning with the acquired knowledge—*situated inductive reasoning*,  
5 is crucial and challenging for machine intelligence. Imagine a scenario: in the  
6 United States, you drive on the right side of the road. When you travel to the UK,  
7 you might initially find it strange how people drive. However, you soon realize  
8 that driving on the left is the norm here and adapt yourself to the new rule. In this  
9 paper, we design Mars, an interactive environment devised for situated inductive  
10 reasoning. It introduces counter-commonsense game mechanisms by modifying  
11 terrain, survival setting and task dependency while adhering to certain principles.  
12 In Mars, agents need to actively interact with their surroundings, derive useful rules  
13 and perform decision-making tasks in specific contexts. We conduct experiments  
14 on various RL-based and LLM-based methods, finding that they all struggle on  
15 this challenging situated inductive reasoning benchmark. Furthermore, we explore  
16 *Induction from Reflection*, where we instruct agents to perform inductive reasoning  
17 from history trajectory. The superior performance underscores the importance of  
18 inductive reasoning in Mars. Through Mars, we aim to galvanize advancements in  
19 situated inductive reasoning and set the stage for developing the next generation of  
20 AI systems that can reason in an adaptive and context-sensitive way.

## 21 1 Introduction

22 Inductive reasoning, a capacity that identifies underlying rules, mechanisms, or general claims of  
23 *unobserved* experience based on past *observations*, undoubtedly plays a pivot role in scientific  
24 discoveries as well as in the conduct of our everyday affairs. Research on the origin and justifications  
25 of such inductive aptitude can date back to the 1900s. David Hume, one of the most influential  
26 philosophers in human nature, presented a critical dilemma as follows:

27 “Why from this (present) experience we form any conclusion *beyond* those past  
28 instances, of which we have had experience.”

29 — Hume [1896], *A Treatise of Human Nature*

30 Hume’s words, also known as “The Problem of Induction”, imply two fundamental questions  
31 of inductive reasoning: ❶ How to summarize and form conclusions from the *present*, and live

**Instruction:** In **Mars**, your goal is to unlock achievements: < collect wood, collect diamond, place table, ... >

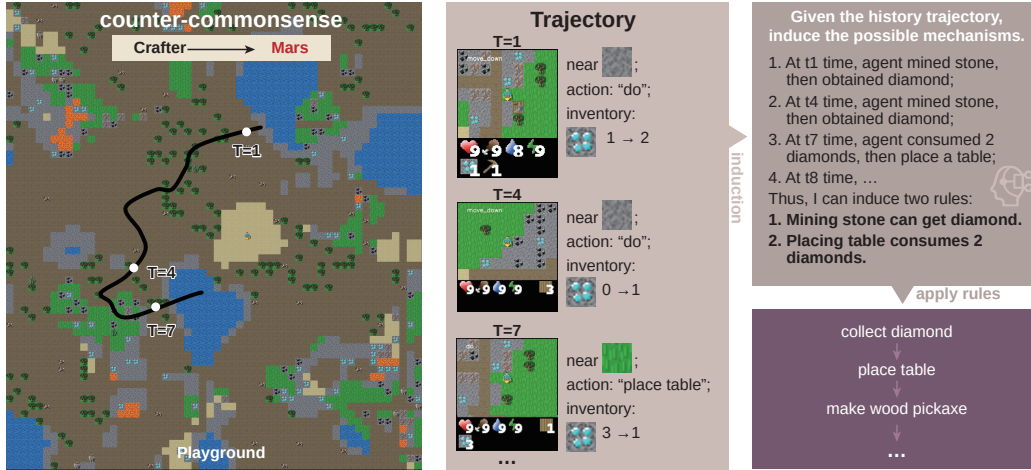

Figure 1: **Mars**, an open-world environment for situated inductive reasoning, involves inductive reasoning through active interaction and applying newly acquired rules to make context-sensitive decisions. First, built on Crafter, we introduce counter-commonsense elements to design Mars. Agents interact with the environment and accumulate historical trajectories. For example, an agent might observe that regardless of time or location, mining stone always yields diamonds; using 2 diamonds can craft a table. Consequently, the agent can induce rules “Mining stone yields diamond” and “Placing table consumes 2 diamonds”. When tasked with making a wooden pickaxe, the agent can apply these rules to plan and execute specific actions in different contexts.

observations? ② Based on summarizations, how to derive *inductive* conclusions (*i.e.*, rules or general claims) beyond past experiences? To answer these two questions, we anticipate two crucial aspects existing in the process of inductive reasoning.

- **Situatedness:** Question ① poses a challenge to understand situations dynamically and reason with the present knowledge accordingly, *i.e.*, situated reasoning. Cognitive studies also indicate that cognition cannot be separated from context and that learning occurs in a situated activity that encompasses social, cultural, and physical contexts [Brown et al., 1989, Roth and Jornet, 2013, Greeno, 1998, Lave and Wenger, 1991].
- **Abstractiveness:** The capability of summarizing observations into abstract “conclusions” that go beyond old experiences, *e.g.*, symbols, logics, rules and causal relations, is highlighted in question ②. Prior research works on inductive reasoning [Zhang et al., 2021a, Raven, 2003, Nye et al., 2020] mostly focus on this side by formalizing such a process within rigorous logical forms and performing evaluations directly based on inductive logical rules.

To cover both aspects, we introduce **Mars**, a novel interactive environment that aims at benchmarking models’ capabilities on **situated inductive reasoning**, in which models are required to quickly derive new general knowledge (rules) from interactions within a specific environment and apply the newly acquired knowledge effectively in a new context, rather than merely storing, retrieving or using pre-existing knowledge. Built on the foundation of Crafter [Hafner, 2021], an open-world survival game, we modify three categories of the default game mechanisms: terrain, survival settings, and task dependencies (§2). Sampling from the combinations of the three kinds of mechanism changes, Mars can generate numerous different worlds with distinct properties. In each world, agents need to continuously interact with the environment and accomplish tasks until the end of their lifespan. However, they cannot merely leverage their prior knowledge (such as “consuming cows increases health”) since these pre-stored “earth” knowledge might no longer apply on Mars. Instead, they have to actively induce the rules of the new world, which provides a valuable testbed for their situated inductive reasoning abilities.

Table 1: Comparison between Mars and related benchmark.

| Datasets                                                                                             | task   | type                | interactive? | situated? | induction? | evidence    | source                |
|------------------------------------------------------------------------------------------------------|--------|---------------------|--------------|-----------|------------|-------------|-----------------------|
| ARC [2019]                                                                                           | q.a.   | visual              | ✗            | ✗         | ✓          | pre-defined | synthetic             |
| MiniSCAN [2020]                                                                                      | q.a.   | visual              | ✗            | ✗         | ✓          | pre-defined | synthetic             |
| ACRE [2021a]                                                                                         | q.a.   | visual              | ✗            | ✗         | ✓          | pre-defined | synthetic             |
| List Functions [2020, 2021b, 2022]                                                                   | q.a.   | symbol              | ✗            | ✗         | ✓          | pre-defined | human-written         |
| RAVEN [2019]                                                                                         | q.a.   | visual              | ✗            | ✗         | ✓          | pre-defined | synthetic             |
| DERR [2022]                                                                                          | q.a.   | language            | ✗            | ✗         | ✓          | pre-defined | Wikipedia             |
| bAbI-16 [2015]                                                                                       | q.a.   | language            | ✗            | ✗         | ✓          | pre-defined | synthetic             |
| STAR [2024]                                                                                          | q.a.   | visual              | ✗            | ✓         | ✗          | -           | human activity videos |
| SQA-3D [2022]                                                                                        | q.a.   | 3D                  | ✗            | ✓         | ✗          | -           | 3D indoor             |
| SOK-Bench [2024b]                                                                                    | q.a.   | visual              | ✗            | ✓         | ✗          | -           | real-world activities |
| IQA [2018]                                                                                           | q.a.   | visual              | ✓            | ✗         | ✗          | -           | indoor                |
| MP3D-EQA [2019]                                                                                      | q.a.   | 3D                  | ✓            | ✗         | ✗          | -           | indoor                |
|  <b>Mars</b> (Ours) | policy | visual <sup>1</sup> | ✓            | ✓         | ✓          | open-ended  | synthetic             |

In §2.3, strict principles govern the design of each sampled new world. These principles ensure resource balance, supply exceeding demand, and the achievability of each task. By adhering to these guidelines, Mars avoids creating a purely fantastical or unstable world, allowing the agents to effectively utilize their extensive prior knowledge.

Our work is closely related to the recent surge of LLM-as-agents [Brown et al., 2020, Zhang et al., 2022, Chowdhery et al., 2023], where LLMs behave as reasoning agents and present impressive capabilities in embodied planning and acting, question answering, machine translation, *etc.* [Ahn et al., 2022, Du et al., 2023, Wang et al., 2024a, Shinn et al., 2023, Bubeck et al., 2023, Gao et al., 2023, Wang et al., 2023a, Mihaylov et al., 2018]. However, most of these tasks are rich in world knowledge, allowing LLMs to exploit their vast stored knowledge to perform the tasks instead of reasoning. Recently, some research conduct counter-commonsense experiments through QA tasks [Wu et al., 2023, Saparov and He, 2022, Dasgupta et al., 2022, Tang et al., 2023, Han et al., 2022]. They primarily evaluate model’s ability to apply some given knowledge (rules) to reason in new context without learning new rules from the given context. Another line of inductive reasoning work [Mirchandani et al., 2023, Kim et al., 2022, Weston et al., 2015, Yang et al., 2022] provides pre-defined evidence (input-output pairs) and evaluates performance on some new input, instead of actively interacting with the environment to collect evidence, inducing new rules, and applying the induced rules in context. Comparisons with relevant tasks and benchmarks are listed in Table 1.

In §3, we carefully select seven representative worlds with varying difficulty (deviation from common-sense) from our proposed Mars. We then evaluate them using state-of-the-art online reinforcement learning methods and LLM agents. Moreover, inspired by the prior success of relexion [Shinn et al., 2023], we propose a novel LLM-based pipeline, *induction from reflection* (IfR), where LLM is forced to engage in a reflective thinking process to induce new game rules. Our findings indicate that current models perform poorly in these settings, highlighting the need for improved situated inductive reasoning skills that go beyond static knowledge application.

## 2 The Mars Environment

Mars is designed as an interactive open-world survival game, aiming at evaluating an agent’s situated inductive reasoning capability, as depicted in Figure 1. Building on the foundation of Crafter [Hafner, 2021], Mars can strategically alter certain commonsense, including terrain, survival settings and task dependencies, while adhering to certain principles related to resource balance, item quantities, and task achievability.

### 2.1 Basic Setting: Crafter

Crafter Hafner [2021] is an open-world survival game designed to evaluate a wide range of general abilities, including robust generalization, deep exploration and long-horizon reasoning. In this demanding environment, the agent (*e.g.*, a policy model) is asked to unlock all achievements while ensuring its survival. Each episode generates a unique world featuring diverse terrains such as

<sup>1</sup>We also provide the interface to translate visual information into language.

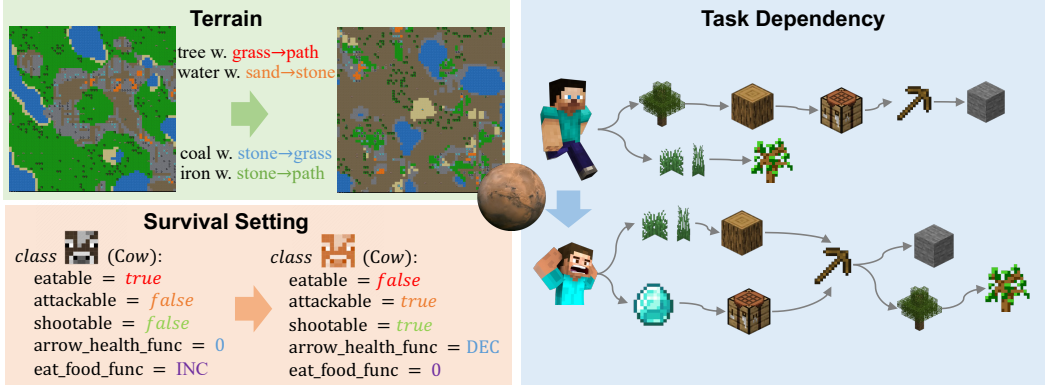

Figure 2: Examples of three kinds of modification to commonsense elements. Please refer to Appendix A.4 for more details.

94 grasslands, lakes, and mountains, randomly populated with entities like cows, trees, and zombies.  
95 The game world is structured on a  $64 \times 64$  grid, yet the agent’s observation is restricted to a  $7 \times 9$  grid,  
96 with an additional  $2 \times 9$  grid space for displaying inventory and status, making Crafter a partially  
97 observed environment. At each step, the agent gathers information about the surrounding terrain, its  
98 health, food, drink, energy levels, and inventory. Following this, the agent must select an action from  
99 a set of 17 possible actions.

## 100 2.2 Modification: From Crafter to Mars

101 To challenge the agent with an environment that deviates from prior (parametric) knowledge and  
102 necessitates situated inductive reasoning, we introduce targeted modifications to typical commonsense  
103 elements, classified into three categories (Figure 2):

104 **Terrain** Terrain includes two aspects: terrain distribution and terrain effect. In the default Crafter  
105 setting, common terrain distributions are predictably arranged, *e.g.*, minerals like coal, iron, and  
106 diamonds are discovered near stone formations. Terrain effects involve whether a terrain can be  
107 traversed and whether doing so benefits or harms the agent’s health, or even results in death. These  
108 terrain characteristics guide the agent’s exploration strategies and efficiency. We disrupt these norms  
109 by altering the distribution and effects of these elements, *i.e.*, trees may now grow near sand rather  
110 than grass and lava is not hot.

111 **Survival Settings** We introduce a novel axis of variation in survival dynamics. It mainly involves  
112 characteristics of entities like cows, zombies, skeletons, plants (edibility, aggressiveness, proximity  
113 effects, mobility) as well as the impact on the agent’s status level (health, food and drink) when  
114 consuming these entities and drink. For example, in Crafter world, cows can enhance the agent’s  
115 food levels upon consumption; in this altered reality, cows may exhibit hostile behaviors.

116 **Task Dependency** Agents can collect many resources by mining some materials and use them  
117 to build tools and place objects. To this end, we classify them into three kinds of achievements:  
118 collecting, placing and crafting. Please refer to Appendix A.4 for more details.

119 **Collecting** Collecting involves using a tool to mine items and obtain resources while leaving behind  
120 some terrain materials. Modifications include altering resources to visually resemble something else,  
121 leading to unexpected outcomes (*e.g.*, coal appearing as stone so that mining stone will collect coal  
122 instead). Tools for mining are randomly selected (hand, wooden, iron, stone pickaxe), and the leftover  
123 materials are randomly sampled. Liquid terrains (water, lava, sand) may leave behind creatures (*e.g.*,  
124 zombies) with default behaviors.

125 **Placing and Crafting** Modifications to placing focus on the ignitability of materials, which  
126 is randomized for wood, stone, coal, iron, and diamond. Crafting tables can be made from any  
127 material while furnaces, which are used for smelting, must be crafted from non-flammable substances.  
128 Regarding crafting achievements, we assume that the names of items often reflect their materials.  
129 Thus, we do not alter the raw materials used for tools. Instead, we consider whether a table or furnace

is required based on the ignitability of the materials. For items that are ignitable, both a table and a furnace are required, whereas for non-flammable items, a table suffices.

## 2.3 Principles of new world

While we can sample numerous new worlds following the above procedure, we carefully designed several strict principles so that they are not completely fantastical and are always playable.

- The new world does not introduce additional resources or objects; it only modifies the functions or effects of existing game objects and materials. To ensure playability, we guarantee that each collected item has at least one obtainable method and each tool has a practical use, motivating the agent to engage in crafting. We maintain the same achievements as the default Crafter environment to allow for fair comparisons in subsequent experimental evaluations.
- We adhere to the resource balance principle. For every resource that can be increased by some event, there must be a corresponding event that can decrease the resource, maintaining a balance. For instance, if the agent loses health when attacked by a cow, there should be scenarios where the health level increases, such as eating zombie.
- We also ensure that each achievement is achievable. For example, if mining wood requires a wooden pickaxe, but crafting a wooden pickaxe requires wood, this creates a deadlock. To prevent such scenarios, we construct an and-or tree and use the depth-first search (DFS) algorithm to verify that each task in the technology tree has a viable path to the root node, confirming the feasibility of each task. Additionally, we also develop an automated program to evaluate terrain distribution, walkable materials, and task dependencies generated by item recipes, ensuring all items are accessible. For example, assuming that coal and stone are not directly traversable, if we place diamonds around the stone (because mining stone is a precondition for mining diamonds based on task dependency and diamonds are not walkable), the agent is unable to reach the stone and complete the “mine stone” task.
- We ensure supply exceeds demand: the quantity of items required for task achievements must be greater than what the world provides. For instance, if wood requires collecting at least five diamonds, but the world does not have enough diamonds. Additionally, our world includes mechanisms for renewable resources, such as mining a tree potentially leaving behind a coal terrain. This dynamic aspect means that the availability of resources cannot be measured statically. To address this, we develop an algorithm that simulates the process of unlocking all achievements within the Tech Tree to test whether the dynamically regenerating resources of the world are sufficient to complete all tasks.

## 3 Evaluation on Mars

### 3.1 Evaluation Setup

**Metrics** We use three evaluation metrics as in Hafner [2021] to assess the performance of models’ situated inductive reasoning abilities: i) The **reward** metric reflects the agent’s skills. Each time an agent unlocks an achievement, the reward increases by 1. When an agent’s health increases or decreases by 1, the reward adjusts by +0.1 or -0.1, respectively. ii) The **success rate** is defined as the proportion of achievements unlocked during the episodes. iii) The **overall score** averages the success rate of the 22 achievements in log-space (to account for differences in their difficulties) as:  $S = \exp(\frac{1}{N} \sum_{i=1}^N \ln(1 + s_i)) - 1$ .

**Evaluation worlds** In Mars, we meticulously select seven different worlds, focusing on individual modifications to terrain, survival settings, and task dependency: Terrain, Survival, and Task Dep. respectively; we concurrently modify two types of commonsense rules: Terr. Surv., Terr. Task., and Surv. Task.; as well as all three types simultaneously: All three. We also conduct experiments in the Crafter setting (*i.e.*, Default). Configurations of worlds are in Appendix I.

### 3.2 Baselines

To evaluate Mars, we design (1) RL-based methods: PPO [Schulman et al., 2017], DreamerV3 [Hafner et al., 2023]; (2) LLM-based methods: ReAct [Yao et al., 2022], Reflexion [Shinn et al., 2023], revised



framework motivated by skill library [Xin et al., 2023, Wang et al., 2023a] and (3) our proposed framework induction from reflection. Note that RL-based methods individually train a model for each world with 1 million training steps. They do not truly solve the problem of *quickly adapting to new environments* in situated inductive reasoning scenarios. Here, we conduct the experiments only to provide the reference. Our primary comparison focuses on the LLM-based in-context learning methods. We also further test different worlds using the DreamerV3 trained in Crafter (Appendix C).

**RL-based methods:** PPO takes images as input and learns to output actions through policy gradient descent. In our implementation, we use a convolutional neural network (CNN) to parameterize the policy gradient. We use stable\_baselines3 [Raffin et al., 2021] to conduct the experiment with the default parameters. **DreamerV3** [Hafner et al., 2024] is a general and scalable algorithm based on world models using fixed hyperparameters with 3 neural networks. It succeeds across domains by accommodating different signal magnitudes and balance terms in their objectives for various domains. We adopt the default parameters provided in the source code<sup>2</sup>. All agents are trained for 1 million environment steps with reward and tested over 20 independent trials.

**LLM-based methods:** Considering that LLMs cannot accept image inputs, we provide a wrapper that gives text descriptions of gameplay screen, including the coordinates of objects, agent’s status and inventory. More details are provided in Appendix A.3. **ReAct** [Yao et al., 2022] interleaves the generation of reasoning traces and task-specific actions. **Reflexion** [Shinn et al., 2023] builds on top of ReAct by incorporating self-reflection, allowing the model to reflect on past experiences. When the historical trajectory exceeds a certain token limit (set to 3896 tokens here), the model is provided with the reward and score in its context for reflective thinking. Based on JARVIS-1 and Voyager [Wang et al., 2023a,b], we further simplify the framework to adapt to Mars, called **Skill Library**. Detailed introductions are presented in Appendix B.

### 3.3 Induction from Reflection (IfR)

Building on the **Skill Library** framework, we further introduce the *induction from reflection* module in *controller*, as depicted in Figure 3. When the *controller* finishes a subgoal (including “succeed”, “failed” or “time-out”), we force LLM to engage in reflective thinking to induce possible game mechanisms based on the agent’s historical trajectory. The derived rules are then stored in a *rule library*, which the task proposer, planner, and controller can use.

For Skill Library and IfR, we set the learning episodes to 5. For ReAct and Reflexion, which rely on in-context memory instead of external memory, we restrict them to use a finite context window (10 steps or 3896 tokens trajectory). For all LLM-based methods, we use the GPT-4-0125-preview model [Achiam et al., 2023] through OpenAI’s API, with a temperature of 0.7. Other hyper-parameters (e.g., top\_k) are kept at their default settings. The full prompts for all different methods are provided in Appendix H.

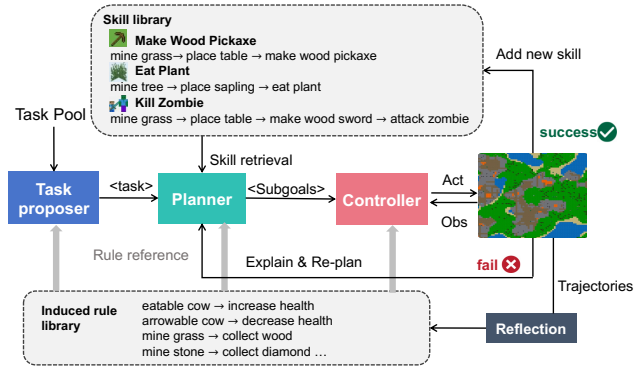

Figure 3: An illustration of the Induction from reflection pipeline for Mars. Given the selected task and the agent’s observation, *planner* decomposes the task into a sequence of subgoals. *Controller* then outputs specific actions to accomplish these subgoals. Successful plans are stored in the *skill library*, while failed plans prompt the agent to perform self-explanation and replan. *Rule library* is updated through reflection on the controller’s execution. By performing inductive reasoning, it saves possible game rules for proposer, planner, and controller using.

<sup>2</sup><https://github.com/NM512/dreamerv3-torch>

Table 2: **Performance comparison of RL-based and LLM-based methods.** Results for LM models are summarized over 9 independent trials while RL methods over 20 independent trials.  $\pm$  captures standard deviations. The best results are in **red** while the seconds are in **blue**.

| Metrics          | Mod. Type   | RL-based methods |                | LLM-based methods |                |                |                |
|------------------|-------------|------------------|----------------|-------------------|----------------|----------------|----------------|
|                  |             | PPO              | DreamerV3      | ReAct             | Reflexion      | Skill Library  | Ours           |
| <b>Reward</b>    | Default     | 1.9 $\pm$ 1.4    | 11.5 $\pm$ 1.6 | 7.7 $\pm$ 1.6     | 6.0 $\pm$ 1.7  | 8.0 $\pm$ 2.1  | 9.0 $\pm$ 2.3  |
|                  | Terrain     | -0.1 $\pm$ 0.6   | 9.3 $\pm$ 2.2  | 7.4 $\pm$ 2.7     | 6.4 $\pm$ 3.0  | 9.5 $\pm$ 2.9  | 8.0 $\pm$ 3.7  |
|                  | Survival    | -0.6 $\pm$ 0.5   | 8.6 $\pm$ 4.1  | 6.4 $\pm$ 3.7     | 4.6 $\pm$ 3.9  | 7.9 $\pm$ 2.9  | 7.7 $\pm$ 3.7  |
|                  | Task. Dep   | 2.1 $\pm$ 1.2    | 8.8 $\pm$ 2.8  | 5.0 $\pm$ 2.1     | 3.2 $\pm$ 1.6  | 1.5 $\pm$ 1.9  | 5.6 $\pm$ 2.9  |
|                  | Terr. Surv. | 0.0 $\pm$ 0.7    | 7.1 $\pm$ 2.1  | 6.7 $\pm$ 2.5     | 4.9 $\pm$ 2.5  | 3.0 $\pm$ 2.5  | 6.8 $\pm$ 1.9  |
|                  | Terr. Task. | -0.7 $\pm$ 0.3   | 6.6 $\pm$ 0.7  | 4.8 $\pm$ 2.0     | 5.3 $\pm$ 2.5  | 5.5 $\pm$ 1.5  | 6.9 $\pm$ 1.8  |
|                  | Surv. Task. | -0.6 $\pm$ 0.4   | 9.6 $\pm$ 3.4  | 1.5 $\pm$ 1.3     | 1.0 $\pm$ 1.6  | 2.3 $\pm$ 1.5  | 3.3 $\pm$ 1.4  |
|                  | All three.  | 0.1 $\pm$ 0.8    | 5.1 $\pm$ 1.8  | 0.7 $\pm$ 1.6     | -0.4 $\pm$ 0.7 | -0.5 $\pm$ 0.5 | 0.1 $\pm$ 0.5  |
| <b>Score (%)</b> | Default     | 1.3 $\pm$ 1.7    | 14.2 $\pm$ 1.3 | 8.0 $\pm$ 1.5     | 5.3 $\pm$ 0.9  | 8.3 $\pm$ 1.3  | 13.0 $\pm$ 2.1 |
|                  | Terrain     | 0.3 $\pm$ 0.1    | 13.0 $\pm$ 1.6 | 7.6 $\pm$ 2.6     | 7.4 $\pm$ 1.6  | 11.9 $\pm$ 3.4 | 11.8 $\pm$ 2.9 |
|                  | Survival    | 0.2 $\pm$ 0.0    | 10.8 $\pm$ 2.8 | 8.0 $\pm$ 0.6     | 5.5 $\pm$ 1.7  | 9.7 $\pm$ 2.0  | 11.0 $\pm$ 3.7 |
|                  | Task. Dep   | 1.7 $\pm$ 0.6    | 12.1 $\pm$ 1.9 | 4.6 $\pm$ 1.6     | 2.2 $\pm$ 0.8  | 1.5 $\pm$ 0.6  | 6.9 $\pm$ 2.5  |
|                  | Terr. Surv. | 0.4 $\pm$ 0.1    | 7.9 $\pm$ 1.3  | 7.1 $\pm$ 3.0     | 4.7 $\pm$ 1.6  | 2.8 $\pm$ 0.6  | 6.7 $\pm$ 0.8  |
|                  | Terr. Task. | 0.1 $\pm$ 0.1    | 4.2 $\pm$ 0.1  | 3.8 $\pm$ 0.3     | 5.5 $\pm$ 1.7  | 4.1 $\pm$ 0.7  | 7.1 $\pm$ 2.5  |
|                  | Surv. Task  | 0.1 $\pm$ 0.1    | 15.9 $\pm$ 2.6 | 1.3 $\pm$ 0.2     | 1.1 $\pm$ 0.1  | 1.9 $\pm$ 0.1  | 2.1 $\pm$ 0.4  |
|                  | All three.  | 0.6 $\pm$ 0.2    | 4.0 $\pm$ 0.3  | 1.0 $\pm$ 0.3     | 0.2 $\pm$ 0.1  | 0.2 $\pm$ 0.0  | 0.6 $\pm$ 0.0  |

### 3.4 Main Results

Table 2 presents the performance of various methods across different environments. Notably, all baseline models exhibit a performance decline when transitioning from the Default to Mars scenarios, with the extent of the decline dependent on the type (*e.g.*, terrain, survival, and task dependency) and the number of modifications. This underscores that **Mars presents significant challenges for current methodologies**. Although our proposed method shows some improvement, its suboptimal performance in the "All three" modified world highlights the urgent need for further research in this complex reasoning context.

For RL-based methods, DreamerV3 outperforms most LLM-based methods, likely due to its extensive exploration, having been trained for 1 million steps. However, in the "All three." scenario, DreamerV3 achieves only a 4% score. This suggests that **counter-commonsense modifications introduce additional complexity to the game mechanics**, thereby increasing the learning difficulty for RL-based models and hindering rapid adaptation.

For LLM-based methods, we observe that altering terrain and survival settings has minimal negative impact on the Skill Library model. However, **changing task dependencies significantly degrades performance**. This is particularly evident when the visual appearance of resources is modified (*e.g.*, mining stone yields wood)—under the "Task Dep." setting, the Skill Library achieves a reward of 1.5 compared to ReAct’s 5.0. This likely occurs because ReAct’s step-by-step reasoning is more adaptable than the Skill Library’s multi-step planning approach. Additionally, the Skill Library’s memory only retains *successful* subgoal sequences, making it challenging to accurately assess the real mechanisms for task completion. Consequently, this leads to incorrect plans and erroneous exploration paths (Appendix D).

This issue also motivates us to introduce "induction from reflection" in LLM-based controller module. It encourages the controller to reflect on the counter-commonsense situations and further explore the actual game mechanisms. From the results, we observe that models equipped with the induction capabilities outperform those without, highlighting the importance of inductive reasoning in a counter-commonsense environment.

### 3.5 Further Analysis

We further plot the success rate of unlocking achievements by the Skill Library model, comparing the default world (Crafter) to the "Task. Dep" world in Mars, as shown in Figure 4. Most achievements

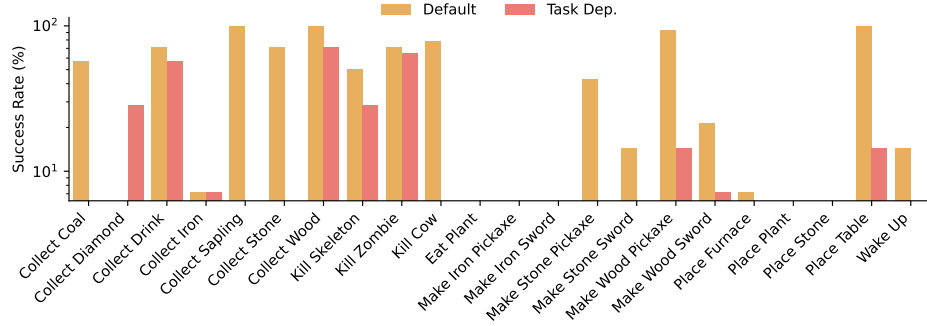

Figure 4: Success rate of unlocking 22 different achievements in log scale by Skill Library model.

involving task dependency category (*e.g.*, collecting, placing) experience a significant drop in performance. Even tasks related to survival, such as collecting drinks, are slightly affected. The performance for “kill something” tasks is likely impacted due to the difficulty in making a sword. Interestingly, the unlock rate for the “collect diamond” task in the “Task. Dep” world is higher than in the “Default” world. This is because, in the modified world, diamonds can be directly mined by hand, making it a straightforward, one-step process that is easy to discover through exploration. However, for the more complex two-step task, “place table”, which requires using two diamonds, the performance is still poorer. These results again highlight that Mars is challenging for current methods. Next, we conduct experimental analyses on situated reasoning and inductive reasoning separately:

**Situated reasoning:** We evaluate the situated reasoning abilities of ReAct by providing it with game rules of each world in context. As shown in Line 2 and Line 4 of Table 3, LLMs perform better when provided with necessary rules. However, “Surv. Task. w/ rules” has lower scores than “Default w/ rules”, indicating significant challenges in understanding and applying counter-commonsense rules. This observation aligns with findings from previous works [Dasgupta et al., 2022, Tang et al., 2023, Saparov and He, 2022].

Table 3: Results of ReAct when provided with game rules.

| Mod. Type            | Score | Reward |
|----------------------|-------|--------|
| Default              | 8.0%  | 7.7    |
| Default w/ rules     | 11.6% | 7.9    |
| Surv. Task.          | 1.3%  | 1.5    |
| Surv. Task. w/ rules | 9.2%  | 4.9    |

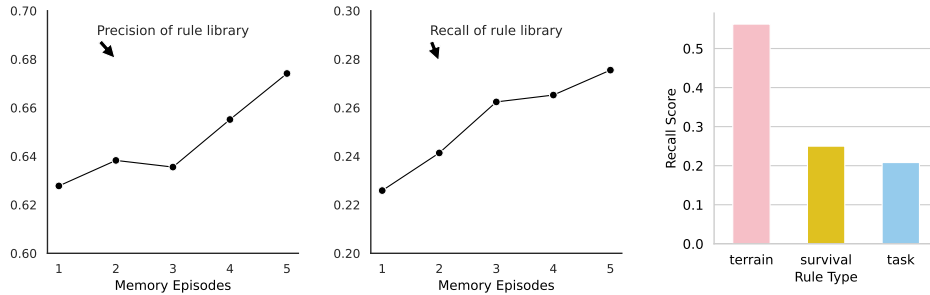

Figure 5: Evaluation of rule library

**Inductive reasoning:** We further evaluate the benefits of IfR. For induced rules (stored in the rule library) and the ground truth rules (provided in the world configurations) in natural language, we measure the precision of the predicted rules and the recall of the ground truth rules using GPT-4 as an evaluator. The results, shown in Figure 5, indicate that the scores improve as the rule library grows with increased memory episodes. However, the recall score of about 28% indicates that there is still much room for improvement. When analyzing the rule types, it can be found that terrain rules are the easiest to induce, followed by survival setting rules, and finally task dependency rules. The results



align with the observations in Table 2—modifying task dependency leads to poorer performance compared to terrain and survival settings, likely due to a larger induction search space.

## 4 Related Work

**Inductive Reasoning.** Inductive reasoning is the ability to infer general principles from specific observations or evidence and apply them to novel situations, which is fundamental to human intelligence [Peirce, 1868]. A few researchers have proposed a myriad of tasks to evaluate inductive reasoning in AI. Representative benchmarks include vision-based reasoning [Mirchandani et al., 2023, Kim et al., 2022, Xu et al., 2023a, Moskvichev et al., 2023, Zhang et al., 2021a, 2019, Barrett et al., 2018, Webb et al., 2020, Hill et al., 2019, Raven, 2003]<sup>3</sup>, program-based induction [Rule, 2020, Zhang et al., 2021b, Srivastava et al., 2022], natural language-based [Weston et al., 2015, Yang et al., 2022] and sequence-to-sequence tasks [Nye et al., 2020]. These tasks usually consist of 2-5 input-output pairs and a test problem. The goal is to infer the rule (*e.g.*, transformation, function) from given examples and apply them to the problem input. Simultaneously, some studies evaluate inductive reasoning capabilities of pretrained large LMs [Gendron et al., 2023, Tang et al., 2023, Xu et al., 2023b, Han et al., 2024, Xu et al., 2023a, Alet et al., 2021]. Honovich et al. [2022] infer an underlying task from a few demonstrations. Wang et al. [2023c], Qiu et al. [2023] proposes hypothesis search and iterative refinement to improve inductive reasoning abilities.

**Situated Reasoning.** Situated reasoning requires agents to understand the situation and surroundings from a dynamic view, then reasoning and accomplishing complex tasks accordingly. SQA3D [Ma et al., 2022] focuses on situated question answering in 3D scenes, requiring agents to comprehend and localize their position and orientation. STAR [Wu et al., 2024] requires agents understand and abstract the dynamic situations presented in the videos. SOK-Bench [Wang et al., 2024b] emphasizes understanding and applying both situated and general knowledge for problem-solving. Other works in embodied question answering place agents in interactive environments, such as MP3D-R2R [Anderson et al., 2018], MP3D-EQA [Wijmans et al., 2019], IQA [Gordon et al., 2018], and EmbodiedQA [Das et al., 2018]. These benchmarks and datasets typically rely on **factual knowledge** (which is only specific to the current situation) extracted from surroundings or some pre-existing commonsense knowledge to perform deductive reasoning accordingly. However, Mars introduces counter-commonsense game mechanisms, which not only require a deep understanding of the current situation but also necessitate learning **general rules** through inductive reasoning.

## 5 Conclusion

In this paper, we introduce  **Mars**, designed to evaluate models’ situated inductive reasoning abilities in adaptive and context-sensitive way. Key components, including terrain, survival settings, and task dependencies, are modified according to certain principles. In Mars, agents are required to actively interact with their surroundings, learn to derive new general knowledge, and perform reasoning using the acquired knowledge. Furthermore, we propose *Induction from Reflection* method, which compels LLMs to perform inductive reasoning from historical trajectories. This approach has demonstrated better performance compared to other LLM-based methods, underscoring the significance of inductive reasoning in counter-commonsense environments.

**Limitations and Future Work** Despite the improved performance of IfR compared to other LLM-based method, the overall performance remains suboptimal. In addition to the model’s limitations in identifying the underlying causes of observations, this could be due to the limited exploration time provided by the five episodes and the relatively inefficient exploration process. Future research could focus on enhancing the model’s exploration efficiency and utilizing induced rules to make more informed guesses. For example, if an agent discovers that lava is walkable and safe, it might hypothesize that water could be dangerous due to resource balance. Additionally, future models could be designed to *automatically* identify the causes and perform inductive reasoning when encountering a new environment, eliminating the need for enforced induction from historical trajectories.

<sup>3</sup>Note that they can also be represented in text format to evaluate LLMs.

## References

- David Hume. *A treatise of human nature*. Clarendon Press, 1896.
- John Seely Brown, Allan Collins, and Paul Duguid. Situated cognition and the culture of learning. *1989*, 18(1): 32–42, 1989.
- Wolff-Michael Roth and Alfredo Jornet. Situated cognition. *Wiley Interdisciplinary Reviews: Cognitive Science*, 4(5):463–478, 2013.
- James G Greeno. The situativity of knowing, learning, and research. *American psychologist*, 53(1):5, 1998.
- Jean Lave and Etienne Wenger. *Situated learning: Legitimate peripheral participation*. Cambridge university press, 1991.
- Chi Zhang, Baoxiong Jia, Mark Edmonds, Song-Chun Zhu, and Yixin Zhu. Acre: Abstract causal reasoning beyond covariation. In *Proceedings of the ieee/cvf conference on computer vision and pattern recognition*, pages 10643–10653, 2021a.
- Jean Raven. Raven progressive matrices. In *Handbook of nonverbal assessment*, pages 223–237. Springer, 2003.
- Maxwell Nye, Armando Solar-Lezama, Josh Tenenbaum, and Brenden M Lake. Learning compositional rules via neural program synthesis. *Advances in Neural Information Processing Systems*, 33:10832–10842, 2020.
- Danijar Hafner. Benchmarking the spectrum of agent capabilities. *arXiv preprint arXiv:2109.06780*, 2021.
- Tom Brown, Benjamin Mann, Nick Ryder, Melanie Subbiah, Jared D Kaplan, Prafulla Dhariwal, Arvind Neelakantan, Pranav Shyam, Girish Sastry, Amanda Askell, et al. Language models are few-shot learners. *Advances in neural information processing systems*, 33:1877–1901, 2020.
- Zhuosheng Zhang, Aston Zhang, Mu Li, and Alex Smola. Automatic chain of thought prompting in large language models. *arXiv preprint arXiv:2210.03493*, 2022.
- Aakanksha Chowdhery, Sharan Narang, Jacob Devlin, Maarten Bosma, Gaurav Mishra, Adam Roberts, Paul Barham, Hyung Won Chung, Charles Sutton, Sebastian Gehrmann, et al. Palm: Scaling language modeling with pathways. *Journal of Machine Learning Research*, 24(240):1–113, 2023.
- Michael Ahn, Anthony Brohan, Noah Brown, Yevgen Chebotar, Omar Cortes, Byron David, Chelsea Finn, Chuyuan Fu, Keerthana Gopalakrishnan, Karol Hausman, et al. Do as i can, not as i say: Grounding language in robotic affordances. *arXiv preprint arXiv:2204.01691*, 2022.
- Yuqing Du, Olivia Watkins, Zihan Wang, Cédric Colas, Trevor Darrell, Pieter Abbeel, Abhishek Gupta, and Jacob Andreas. Guiding pretraining in reinforcement learning with large language models, 2023.
- Zihao Wang, Shaofei Cai, Guanzhou Chen, Anji Liu, Xiaojian Shawn Ma, and Yitao Liang. Describe, explain, plan and select: interactive planning with llms enables open-world multi-task agents. *Advances in Neural Information Processing Systems*, 36, 2024a.
- Noah Shinn, Federico Cassano, Edward Berman, Ashwin Gopinath, Karthik Narasimhan, and Shunyu Yao. Reflexion: Language agents with verbal reinforcement learning, 2023.
- Sébastien Bubeck, Varun Chandrasekaran, Ronen Eldan, Johannes Gehrke, Eric Horvitz, Ece Kamar, Peter Lee, Yin Tat Lee, Yuanzhi Li, Scott Lundberg, et al. Sparks of artificial general intelligence: Early experiments with gpt-4. *arXiv preprint arXiv:2303.12712*, 2023.
- Luyu Gao, Aman Madaan, Shuyan Zhou, Uri Alon, Pengfei Liu, Yiming Yang, Jamie Callan, and Graham Neubig. Pal: Program-aided language models. In *International Conference on Machine Learning*, pages 10764–10799. PMLR, 2023.
- Zihao Wang, Shaofei Cai, Anji Liu, Yonggang Jin, Jinbing Hou, Bowei Zhang, Haowei Lin, Zhaofeng He, Zilong Zheng, Yaodong Yang, et al. Jarvis-1: Open-world multi-task agents with memory-augmented multimodal language models. *arXiv preprint arXiv:2311.05997*, 2023a.
- Todor Mihaylov, Peter Clark, Tushar Khot, and Ashish Sabharwal. Can a suit of armor conduct electricity? a new dataset for open book question answering. *arXiv preprint arXiv:1809.02789*, 2018.
- Zhaofeng Wu, Linlu Qiu, Alexis Ross, Ekin Akyürek, Boyuan Chen, Bailin Wang, Najoung Kim, Jacob Andreas, and Yoon Kim. Reasoning or reciting? exploring the capabilities and limitations of language models through counterfactual tasks. *arXiv preprint arXiv:2307.02477*, 2023.

380 Abulhair Saparov and He He. Language models are greedy reasoners: A systematic formal analysis of chain-of-  
381 thought. *arXiv preprint arXiv:2210.01240*, 2022.

382 Ishita Dasgupta, Andrew K Lampinen, Stephanie CY Chan, Antonia Creswell, Dharshan Kumaran, James L  
383 McClelland, and Felix Hill. Language models show human-like content effects on reasoning. *arXiv preprint*  
384 *arXiv:2207.07051*, 2022.

385 Xiaojuan Tang, Zilong Zheng, Jiaqi Li, Fanxu Meng, Song-Chun Zhu, Yitao Liang, and Muhan Zhang. Large  
386 language models are in-context semantic reasoners rather than symbolic reasoners, 2023.

387 Simeng Han, Hailey Schoelkopf, Yilun Zhao, Zhenting Qi, Martin Riddell, Luke Benson, Lucy Sun, Ekaterina  
388 Zubova, Yujie Qiao, Matthew Burtell, et al. Folio: Natural language reasoning with first-order logic. *arXiv*  
389 *preprint arXiv:2209.00840*, 2022.

390 Suvir Mirchandani, Fei Xia, Pete Florence, Brian Ichter, Danny Driess, Montserrat Gonzalez Arenas, Kanishka  
391 Rao, Dorsa Sadigh, and Andy Zeng. Large language models as general pattern machines. *arXiv preprint*  
392 *arXiv:2307.04721*, 2023.

393 Subin Kim, Prin Phunayaphibarn, Donghyun Ahn, and Sundong Kim. Playgrounds for abstraction and reasoning.  
394 In *NeurIPS 2022 Workshop on Neuro Causal and Symbolic AI (nCSI)*, 2022.

395 Jason Weston, Antoine Bordes, Sumit Chopra, Alexander M Rush, Bart Van Merriënboer, Armand Joulin, and  
396 Tomas Mikolov. Towards ai-complete question answering: A set of prerequisite toy tasks. *arXiv preprint*  
397 *arXiv:1502.05698*, 2015.

398 Zonglin Yang, Li Dong, Xinya Du, Hao Cheng, Erik Cambria, Xiaodong Liu, Jianfeng Gao, and Furu Wei.  
399 Language models as inductive reasoners. *arXiv preprint arXiv:2212.10923*, 2022.

400 François Chollet. On the measure of intelligence. *arXiv preprint arXiv:1911.01547*, 2019.

401 Joshua Stewart Rule. *The child as hacker: building more human-like models of learning*. PhD thesis, Mas-  
402 sachusetts Institute of Technology, 2020.

403 Chiyan Zhang, Maithra Raghu, Jon Kleinberg, and Samy Bengio. Pointer value retrieval: A new benchmark  
404 for understanding the limits of neural network generalization. *arXiv preprint arXiv:2107.12580*, 2021b.

405 Aarohi Srivastava, Abhinav Rastogi, Abhishek Rao, Abu Awal Md Shoeb, Abubakar Abid, Adam Fisch, Adam R  
406 Brown, Adam Santoro, Aditya Gupta, Adrià Garriga-Alonso, et al. Beyond the imitation game: Quantifying  
407 and extrapolating the capabilities of language models. *arXiv preprint arXiv:2206.04615*, 2022.

408 Chi Zhang, Feng Gao, Baoxiong Jia, Yixin Zhu, and Song-Chun Zhu. Raven: A dataset for relational and  
409 analogical visual reasoning. In *Proceedings of the IEEE/CVF conference on computer vision and pattern*  
410 *recognition*, pages 5317–5327, 2019.

411 Bo Wu, Shoubin Yu, Zhenfang Chen, Joshua B Tenenbaum, and Chuang Gan. Star: A benchmark for situated  
412 reasoning in real-world videos. *arXiv preprint arXiv:2405.09711*, 2024.

413 Xiaojian Ma, Silong Yong, Zilong Zheng, Qing Li, Yitao Liang, Song-Chun Zhu, and Siyuan Huang. Sqa3d:  
414 Situated question answering in 3d scenes. *arXiv preprint arXiv:2210.07474*, 2022.

415 Andong Wang, Bo Wu, Sunli Chen, Zhenfang Chen, Haotian Guan, Wei-Ning Lee, Li Erran Li, Joshua B  
416 Tenenbaum, and Chuang Gan. Sok-bench: A situated video reasoning benchmark with aligned open-world  
417 knowledge. *arXiv preprint arXiv:2405.09713*, 2024b.

418 Daniel Gordon, Aniruddha Kembhavi, Mohammad Rastegari, Joseph Redmon, Dieter Fox, and Ali Farhadi. Iqa:  
419 Visual question answering in interactive environments. In *Proceedings of the IEEE conference on computer*  
420 *vision and pattern recognition*, pages 4089–4098, 2018.

421 Erik Wijmans, Samyak Datta, Oleksandr Maksymets, Abhishek Das, Georgia Gkioxari, Stefan Lee, Irfan Essa,  
422 Devi Parikh, and Dhruv Batra. Embodied question answering in photorealistic environments with point cloud  
423 perception. In *Proceedings of the IEEE/CVF Conference on Computer Vision and Pattern Recognition*, pages  
424 6659–6668, 2019.

425 John Schulman, Filip Wolski, Prafulla Dhariwal, Alec Radford, and Oleg Klimov. Proximal policy optimization  
426 algorithms. *arXiv preprint arXiv:1707.06347*, 2017.

427 Danijar Hafner, Jurgis Pasukonis, Jimmy Ba, and Timothy Lillicrap. Mastering diverse domains through world  
428 models. *arXiv preprint arXiv:2301.04104*, 2023.

429 Shunyu Yao, Jeffrey Zhao, Dian Yu, Nan Du, Izhak Shafran, Karthik Narasimhan, and Yuan Cao. React:  
430 Synergizing reasoning and acting in language models. *arXiv preprint arXiv:2210.03629*, 2022.

431 Huajian Xin, Haiming Wang, Chuanyang Zheng, Lin Li, Zhengying Liu, Qingxing Cao, Yinya Huang, Jing  
432 Xiong, Han Shi, Enze Xie, et al. Lego-prover: Neural theorem proving with growing libraries. *arXiv preprint*  
433 *arXiv:2310.00656*, 2023.

434 Antonin Raffin, Ashley Hill, Adam Gleave, Anssi Kanervisto, Maximilian Ernestus, and Noah Dormann. Stable-  
435 baselines3: Reliable reinforcement learning implementations. *Journal of Machine Learning Research*, 22  
436 (268):1–8, 2021.

437 Danijar Hafner, Jurgis Pasukonis, Jimmy Ba, and Timothy Lillicrap. Mastering diverse domains through world  
438 models. 2024.

439 Guanzhi Wang, Yuqi Xie, Yunfan Jiang, Ajay Mandlekar, Chaowei Xiao, Yuke Zhu, Linxi Fan, and Anima  
440 Anandkumar. Voyager: An open-ended embodied agent with large language models. *arXiv preprint*  
441 *arXiv:2305.16291*, 2023b.

442 Josh Achiam, Steven Adler, Sandhini Agarwal, Lama Ahmad, Ilge Akkaya, Florencia Leoni Aleman, Diogo  
443 Almeida, Janko Alvenschmidt, Sam Altman, Shyamal Anadkat, et al. Gpt-4 technical report. *arXiv preprint*  
444 *arXiv:2303.08774*, 2023.

445 Charles S Peirce. Questions concerning certain faculties claimed for man. *The Journal of Speculative Philosophy*,  
446 2(2):103–114, 1868.

447 Yudong Xu, Wenhao Li, Pashootan Vaezipoor, Scott Sanner, and Elias B Khalil. Llms and the abstraction and  
448 reasoning corpus: Successes, failures, and the importance of object-based representations. *arXiv preprint*  
449 *arXiv:2305.18354*, 2023a.

450 Arseny Moskvichev, Victor Vikram Odouard, and Melanie Mitchell. The conceptarc benchmark: Evaluating  
451 understanding and generalization in the arc domain. *arXiv preprint arXiv:2305.07141*, 2023.

452 David Barrett, Felix Hill, Adam Santoro, Ari Morcos, and Timothy Lillicrap. Measuring abstract reasoning in  
453 neural networks. In *International conference on machine learning*, pages 511–520. PMLR, 2018.

454 Taylor Webb, Zachary Dulberg, Steven Frankland, Alexander Petrov, Randall O’Reilly, and Jonathan Cohen.  
455 Learning representations that support extrapolation. In *International conference on machine learning*, pages  
456 10136–10146. PMLR, 2020.

457 Felix Hill, Adam Santoro, David GT Barrett, Ari S Morcos, and Timothy Lillicrap. Learning to make analogies  
458 by contrasting abstract relational structure. *arXiv preprint arXiv:1902.00120*, 2019.

459 Gael Gendron, Qiming Bao, Michael Witbrock, and Gillian Dobbie. Large language models are not strong  
460 abstract reasoners. 2023.

461 Fangzhi Xu, Qika Lin, Jiawei Han, Tianzhe Zhao, Jun Liu, and Erik Cambria. Are large language models really  
462 good logical reasoners? a comprehensive evaluation from deductive, inductive and abductive views. *arXiv*  
463 *preprint arXiv:2306.09841*, 2023b.

464 Simon Jerome Han, Keith J Ransom, Andrew Perfors, and Charles Kemp. Inductive reasoning in humans and  
465 large language models. *Cognitive Systems Research*, 83:101155, 2024.

466 Ferran Alet, Javier Lopez-Contreras, James Koppel, Maxwell Nye, Armando Solar-Lezama, Tomas Lozano-  
467 Perez, Leslie Kaelbling, and Joshua Tenenbaum. A large-scale benchmark for few-shot program induction  
468 and synthesis. In *International Conference on Machine Learning*, pages 175–186. PMLR, 2021.

469 Or Honovich, Uri Shaham, Samuel R Bowman, and Omer Levy. Instruction induction: From few examples to  
470 natural language task descriptions. *arXiv preprint arXiv:2205.10782*, 2022.

471 Ruocheng Wang, Eric Zelikman, Gabriel Poesia, Yewen Pu, Nick Haber, and Noah D Goodman. Hypothesis  
472 search: Inductive reasoning with language models. *arXiv preprint arXiv:2309.05660*, 2023c.

473 Linlu Qiu, Liwei Jiang, Ximing Lu, Melanie Sclar, Valentina Pyatkin, Chandra Bhagavatula, Bailin Wang, Yoon  
474 Kim, Yejin Choi, Nouha Dziri, et al. Phenomenal yet puzzling: Testing inductive reasoning capabilities of  
475 language models with hypothesis refinement. *arXiv preprint arXiv:2310.08559*, 2023.

476 Peter Anderson, Qi Wu, Damien Teney, Jake Bruce, Mark Johnson, Niko Sünderhauf, Ian Reid, Stephen Gould,  
477 and Anton Van Den Hengel. Vision-and-language navigation: Interpreting visually-grounded navigation  
478 instructions in real environments. In *Proceedings of the IEEE conference on computer vision and pattern*  
479 *recognition*, pages 3674–3683, 2018.

480 Abhishek Das, Samyak Datta, Georgia Gkioxari, Stefan Lee, Devi Parikh, and Dhruv Batra. Embodied question  
481 answering. In *Proceedings of the IEEE conference on computer vision and pattern recognition*, pages 1–10,  
482 2018.

## 483 Checklist

484 The checklist follows the references. Please read the checklist guidelines carefully for information on  
485 how to answer these questions. For each question, change the default **[TODO]** to **[Yes]**, **[No]**, or  
486 **[N/A]**. You are strongly encouraged to include a **justification to your answer**, either by referencing  
487 the appropriate section of your paper or providing a brief inline description. For example:

- 488 • Did you include the license to the code and datasets? **[Yes]** See Section ??.
- 489 • Did you include the license to the code and datasets? **[No]** The code and the data are  
490 proprietary.
- 491 • Did you include the license to the code and datasets? **[N/A]**

492 Please do not modify the questions and only use the provided macros for your answers. Note that the  
493 Checklist section does not count towards the page limit. In your paper, please delete this instructions  
494 block and only keep the Checklist section heading above along with the questions/answers below.

### 495 1. For all authors...

- 496 (a) Do the main claims made in the abstract and introduction accurately reflect the paper’s  
497 contributions and scope? **[Yes]** Our contribution of designing the new benchmark Mars  
498 for situated inductive reasoning has been claimed in the abstract and introduction.
- 499 (b) Did you describe the limitations of your work? **[Yes]** See Section 5.
- 500 (c) Did you discuss any potential negative societal impacts of your work? **[N/A]**
- 501 (d) Have you read the ethics review guidelines and ensured that your paper conforms to  
502 them? **[Yes]**

### 503 2. If you are including theoretical results...

- 504 (a) Did you state the full set of assumptions of all theoretical results? **[N/A]**
- 505 (b) Did you include complete proofs of all theoretical results? **[N/A]**

### 506 3. If you ran experiments (e.g. for benchmarks)...

- 507 (a) Did you include the code, data, and instructions needed to reproduce the main experi-  
508 mental results (either in the supplemental material or as a URL)? **[Yes]** See code link  
509 in the first page.
- 510 (b) Did you specify all the training details (e.g., data splits, hyperparameters, how they  
511 were chosen)? **[Yes]** See Section 3.
- 512 (c) Did you report error bars (e.g., with respect to the random seed after running experi-  
513 ments multiple times)? **[Yes]** See Section 3.
- 514 (d) Did you include the total amount of compute and the type of resources used (e.g., type  
515 of GPUs, internal cluster, or cloud provider)? **[Yes]** See Appendix F.

### 516 4. If you are using existing assets (e.g., code, data, models) or curating/releasing new assets...

- 517 (a) If your work uses existing assets, did you cite the creators? **[Yes]** See Section 2.
- 518 (b) Did you mention the license of the assets? **[Yes]** See Appendix G.
- 519 (c) Did you include any new assets either in the supplemental material or as a URL? **[Yes]**  
520 See supplemental material or code link.
- 521 (d) Did you discuss whether and how consent was obtained from people whose data you’re  
522 using/curating? **[N/A]** The existing assets are open-sourced.
- 523 (e) Did you discuss whether the data you are using/curating contains personally identifiable  
524 information or offensive content? **[N/A]** No personal information.



- 525 5. If you used crowdsourcing or conducted research with human subjects...
- 526 (a) Did you include the full text of instructions given to participants and screenshots, if
- 527 applicable? [N/A]
- 528 (b) Did you describe any potential participant risks, with links to Institutional Review
- 529 Board (IRB) approvals, if applicable? [N/A]
- 530 (c) Did you include the estimated hourly wage paid to participants and the total amount
- 531 spent on participant compensation? [N/A]

## 532 Appendix

### 533 A Additional Mars details

#### 534 A.1 Benchmark URLs and Links

535 Mars is published under the open-source MIT license on Github [https://github.com/](https://github.com/XiaojuanTang/Mars)  
536 [XiaojuanTang/Mars](https://github.com/XiaojuanTang/Mars). Code for all the benchmark models are available within the same GitHub  
537 repository. We provide detailed descriptions at [https://github.com/XiaojuanTang/](https://github.com/XiaojuanTang/Mars/blob/master/README.md)  
538 [Mars/blob/master/README.md](https://github.com/XiaojuanTang/Mars/blob/master/README.md). The documentation covers:

- 539 • Step-by-step instructions for setting up the Mars environment.
- 540 • Guidelines on how to load and use various world configurations.
- 541 • Descriptions of the configurations. See details in Appendix A.4 and Appendix I.
- 542 • Benchmark code and examples of how to run the benchmarks.

#### 543 A.2 Maintenance and Long Term Preservation

544 The Mars dataset is an interactive environment built on the Crafter framework, designed to evaluate  
545 situated inductive reasoning in agents. The authors of Mars are committed to maintaining and  
546 preserving this environment. Ongoing maintenance also encompasses tracking and resolving issues  
547 identified by the broader community after release. User feedback will be closely monitored via the  
548 GitHub issue tracker.

#### 549 A.3 Details of environment descriptor

550 The gameplay screen consists of a  $9 \times 9$  grid  $((i, j) | 1 \leq i, j \leq 9)$ . The top seven rows provide a local  
551 view of the world; each cell  $(i, j)$  is associated with a predefined background (e.g., “grass”, “stone”,  
552 “sand”) and potentially an object (e.g., “tree”, “cow”). The bottom two rows represent the agent’s  
553 status (e.g., “health”, “food”) and item inventories, which include images of items (e.g., “stone”,  
554 “stone sword”) and the quantity of each item in the inventory.

555 Our environment descriptor processes the gameplay screen as input and outputs a textual description  
556 of the screen. This description includes the agent’s action, nearby block information, agent status,  
557 and inventory details. Specifically:

- 558 • **Action:** The descriptor outputs the specific action taken by the agent, such as “I took action  
559 move\_left”.
- 560 • **Nearby Block Information:** For cells containing objects, the descriptor focuses on the objects;  
561 for cells without objects, it focuses on the background. It first identifies all types of backgrounds  
562 and objects within the  $7 \times 9$  grid. The text descriptor outlines the background material closest to  
563 the agent and enumerates all objects, including their coordinates. For example, “I see: (objects  
564 with coordinate) path is in front of me. <path(-1, 0), path(1, 0), path(0, -1), path(0, 1), path(-1,  
565 -1), path(1, -1), path(-1, 1), path(1, 1), stone(-2, -1), tree(-3, 0)>”.
- 566 • **Agent Status:** The descriptor provides the agent’s health, food, drink, and energy levels, each of  
567 which ranges from 0 to 9.
- 568 • **Inventory:** The descriptor outputs the types and quantities of items present in the inventory.

569 Below is a comprehensive example:

**Agent’s observation:**

I took action move\_left.

I am on the path.

I see: (object with coordinate)

tree is in front of me.

<tree(-1, 0), path(1, 0), stone(0, -1), path(0, 1), stone(-1, -1), path(1, -1), stone(-1, 1), path(1, 1), water(-3, 0), sand(-3, 3)>

My status: <health: 9/9, food: 9/9, drink: 9/9, energy: 9/9>

I have nothing in your inventory.

#### A.4 Details of modified commonsense elements

In this section, we introduce the modified commonsense elements in detail, including terrain, survival settings and task dependency. We also provide the configuration of Crafter world. The configurations of Mars world are in Appendix I.

#### A.5 Terrain

Modification of terrain involves two aspects: terrain distribution and terrain effect. The terrain material includes water, grass, stone, path, sand, tree, lava, coal, iron and diamond,

- **Terrain Distribution:** In the default Crafter environment, common terrain distributions are predictably arranged: sand typically encircles bodies of water; trees are prevalent near grasslands; and minerals like coal, iron, diamonds, and lava are found near stone formations. The player is usually born in grass. In Mars, we modify the terrain neighbors or swap terrain names to change the terrain distribution. Specifically, for the first modification type, we sample the surroundings of coal, iron, diamond, lava, tree, player, and water terrains with one of the terrain materials. For example, coal could be placed near grasslands. Note that we ensure each type of terrain material is sampled, and each item is accessible. For the second modification type, we exchange different terrain names. For instance, we swap the positions of stone and iron terrains.
- **Terrain Effect:** This involves whether a terrain can be traversed and whether doing so benefits or harms the agent’s health or even results in death. To this end, we assign each terrain material (except trees, due to their inherent height, despite the 2D game’s limitations) three attributes: walkable, walk\_health, and dieable. We randomly assign values to these three attributes: walkable: [True, False]; walk\_health: [-1,0,+1]; dieable: [True, False]. For example, envision a planet where you discover energy stones unlike anything on Earth, or where, surprisingly, lava is not hot. Note that if the terrain material is not walkable, the dieable and walk\_health attributes have no practical significance.

Here is the Crafter setting:

Terrain distribution of Crafter:

```
terrain_neighbour:
  coal: stone
  iron: stone
  diamond: stone
  lava: stone
  tree: grass
  player: grass
  water: sand
```

Terrain effect of Crafter:

```

609 terrain_effect:
610
611     stone: {walkable: false, walk_health: 0, dieable: false}
612     diamond: {walkable: false, walk_health: 0, dieable: false}
613     coal: {walkable: false, walk_health: 0, dieable: false}
614     iron: {walkable: false, walk_health: 0, dieable: false}
615     water: {walkable: false, walk_health: 0, dieable: false}
616     lava: {walkable: true, walk_health: 0, dieable: true}
617     grass: {walkable: true, walk_health: 0, dieable: false}
618     path: {walkable: true, walk_health: 0, dieable: false}
619     sand: {walkable: true, walk_health: 0, dieable: false}
620     tree: {walkable: false, walk_health: 0, dieable: false}
621

```

## 622 A.6 Survival settings

623 This modification mainly involves the characteristics of objects, including cows, zombies, skeletons,  
624 ripe-plants, as well as drinks like water and lava. For example, in Crafter world, cows can enhance  
625 the agent’s food levels upon consumption; zombies approach and harming the agent; skeletons shoot  
626 arrows that cause damage to the agent; water replenishes the agent’s drink level. In this altered  
627 reality, cows may exhibit hostile behaviors, consuming a ripe plant could increase hunger due to its  
628 digestion-enhancing properties, and consuming overly salty zombie flesh could increase thirst (if the  
629 zombie is edible in this world). Specifically, for objects, we set the following attributes:

- 630 • `eatable`: Indicates if the object is edible;
- 631 • `eat_health_damage_func`: The impact on the agent’s health when consumed (increase, decrease,  
632 or no effect);
- 633 • `inc_food_func`: The impact on the agent’s food level when consumed.
- 634 • `inc_thirst_func`: The impact on the agent’s thirst level when consumed;
- 635 • `arrowable`: Indicates if the object can perform shooting actions;
- 636 • `arrow_damage_func`: the impact on the agent’s health when shot.
- 637 • `closable`: Indicates if the object will move towards the agent;
- 638 • `can_walk`: Indicates if the object can move.
- 639 • `closable_health_damage_func`: The impact on the agent’s health when the object is near.

640 For drinks, we set the following attributes:

- 641 • `inc_drink_func`: The impact on the agent’s drink level when consumed.
- 642 • `inc_health_func`: The impact on the agent’s health level when consumed.
- 643 • `inc_food_func`: The impact on the agent’s food level when consumed.

644 We randomly assign the value to those attributes to modify the survival setting. For example, zombies  
645 shooting arrows that cause damage to the agent, *i.e.*, “`arrowable=True, arrow_damage_func=-1`”;  
646 drink lava can increase agent’s health, *i.e.*, “`inc_health_func=+1`”.

647 The survival setting of Crafter is as below:

```

648 COW:
649
650     eatable: true
651     arrowable: false
652     closable: false
653     can_walk: true
654     closable_health_damage_func: 0
655     eat_health_damage_func: 0
656     arrow_damage_func: 0
657     inc_food_func: 1
658     inc_thirst_func: 0

```

```

659 zombie:
660     eatable: false
661     arrowable: false
662     closable: true
663     can_walk: true
664     closable_health_damage_func: -1
665     eat_health_damage_func: 0
666     arrow_damage_func: 0
667     inc_food_func: 0
668     inc_thirst_func: 0
669 skeleton:
670     eatable: false
671     arrowable: true
672     closable: false
673     can_walk: true
674     closable_health_damage_func: 0
675     eat_health_damage_func: 0
676     arrow_damage_func: -1
677     inc_food_func: 0
678     inc_thirst_func: 0
679 plant:
680     eatable: true
681     arrowable: false
682     closable: false
683     can_walk: false
684     closable_health_damage_func: 0
685     eat_health_damage_func: 0
686     arrow_damage_func: 0
687     inc_food_func: 1
688     inc_thirst_func: 0

```

## 690 A.7 Task Dependency

691 Agents can collect many resources, such as saplings, wood, stone, coal, iron and diamond and use  
692 them to build tools or place objects. Many of the resources require tools that require even more  
693 basic tools and resources, leading to a technology tree with several levels. Typically, agents start  
694 by collecting wood, crafting a wooden pickaxe, then progressing to stone, coal, and so on, with  
695 diamond collection being the ultimate and most challenging achievement. However, in our new  
696 environment, these dependencies are disrupted; for example, collecting diamonds no longer requires  
697 an iron pickaxe, and collecting wood now requires specific tools. To this end, we consider three kinds  
698 of achievements: collecting, placing and crafting. Refer to Appendix A.4 for more details.

699 **Collecting:** The task of collecting involves mining a terrain material with a tool or hand to receive  
700 items while leaving other materials behind. For example, chopping down a tree by hand may yield  
701 wood while leaving grass. Following this, we implement three different changes to received items:

- 702 • *Visual Misleading:* In this modified world, mining a resource may yield an unexpected item.  
703 For instance, what appears to be coal could actually yield stone instead, as stone may visually  
704 resemble coal in this unconventional world. Specifically, we randomly permute the expected  
705 items (including wood, stone, coal, iron, diamonds and sapling) for terrains (including grass,  
706 trees, stone, coal, iron, and diamonds). For liquid terrains such as water and lava, the output  
707 (e.g., whether agents receive a drink) is randomly assigned as “True” or “False”. This approach  
708 selectively disrupts the visual alignment of solid materials without confusing them with liquids,  
709 maintaining the challenge of non-common knowledge rather than creating a completely fantastical  
710 or symbolic world.



- *Traditional Association with Exceptions:* Contrary to the first, this easier modification maintains the traditional association between an item's appearance and its material composition, i.e., mining stone yields stone. However, trees, while still visually resembling trees, can produce unconventional items such as diamonds or coal. Similarly, mining grass can also yield stone. To achieve this, for stone, coal, iron and diamonds, mine them still yield stone, coal, iron and diamonds respectively. For tree and grass, we random sample from items {wood, stone, coal, iron, diamonds and sapling} and ensure each item has at least one obtainable method.
- *Probabilistic Outcomes:* Building on the second modification, we introduce a probabilistic element where mining a resource might yield multiple potential outputs with certain probabilities. For instance, mining stone with a wooden pickaxe might primarily produce stone but also offer a chance (e.g., 10% probability) of finding coal. This probabilistic approach, where resource extraction can be unpredictable and yield secondary resources, increases the game's difficulty while also simulating real-world scenarios. Specifically, for stone, coal, iron, and diamond, mining them not only yields their respective items but also has a 10% probability of dropping other items, including wood, stone, coal, iron, and saplings, which are randomly sampled.

In addition to changes in received items, we also modify the tools used for mining. These tools are randomly sampled from {null (using hands), sapling, wooden pickaxe, stone pickaxe, and iron pickaxe}. Each tool must have a practical use to motivate the agent to engage in crafting. After mining, the material left behind is also randomly sampled from different terrain types. For instance, mining a tree may leave behind another tree, indicating that trees in this world grow rapidly and are inexhaustible. For liquid-like terrain such as water, lava and sand, there may even be a chance of leaving behind creatures like zombies, cows, or skeletons, each behaving according to their default characteristics.

Here is one example of modified collecting tasks:

```
collect:
  tree: {require: {iron_pickaxe: 1}, receive: {coal: 1}, leaves:
    {material: iron, object: null}}
  stone: {require: {}, receive: {stone: 1}, leaves: {material:
    path, object: null}}
  water: {require: {sapling: 1}, receive: {drink: 1}, leaves: {
    material: lava, object: {skeleton: 0.1}}}
```

Here is the Crafter setting:

```
collect:
  tree: {require: {}, receive: {wood: 1}, leaves: {material:
    grass, object: null}}
  stone: {require: {wood_pickaxe: 1}, receive: {stone: 1},
    leaves: {material: path, object: null}}
  coal: {require: {wood_pickaxe: 1}, receive: {coal: 1}, leaves:
    {material: path, object: null}}
  iron: {require: {stone_pickaxe: 1}, receive: {iron: 1}, leaves
    : {material: path, object: null}}
  diamond: {require: {iron_pickaxe: 1}, receive: {diamond: 1},
    leaves: {material: path, object: null}}
  water: {require: {}, receive: {drink: 1}, leaves: {material:
    water, object: null}}
  lava: {require: {}, receive: {drink: 1}, leaves: {material:
    lava, object: null}}
  grass: {require: {}, receive: {sapling: {amount: 1,
    probability: 0.1}}, leaves: {material: grass, object: null}}
  sand: {require: {}, receive: {}, leaves: {material: sand ,
    object: null}}
```

766 **Placing** For placing achievements, we focus on the ignitability of materials while keeping the  
767 requirements for placing stone and saplings unchanged, as these tasks do not involve crafting. To  
768 this end, we add the attribute of ignitability for wood, stone, coal, iron, and diamond. We randomly  
769 sample the value from [True, False] and ensure a mix of flammable and non-flammable materials.  
770 Crafting tables can be made from any material, while furnaces, which are used for smelting, must  
771 be crafted from non-flammable substances. For example, if stone is flammable, it cannot be used to  
772 make a furnace. Therefore, the materials for crafting tables can be sampled from wood, stone, coal,  
773 iron, and diamond, while the materials for making furnaces must be selected from non-flammable  
774 substances. Additionally, saplings can grow on stone as well as grass (reflecting the possibility that  
775 saplings on this planet have exceptionally strong vitality).

776 Here is the Crafter setting for placing achievements:

```
777 ignitability:  
778     wood: true  
779     coal: true  
780     iron: true  
781     diamond: false  
782     stone: false  
783 place:  
784     stone: {uses: {stone: 1}, where: [grass, sand, path, water,  
785     lava], type: material}  
786     table: {uses: {wood: 2}, where: [grass, sand, path], type:  
787     material}  
788     furnace: {uses: {stone: 4}, where: [grass, sand, path], type:  
789     material}  
790     plant: {uses: {sapling: 1}, where: [grass], type: object}
```

793 Here is one example of modified placing tasks:

```
794 ignitability:  
795     wood: true  
796     coal: true  
797     iron: false  
798     diamond: true  
799     stone: false  
800 place:  
801     stone: {uses: {stone: 1}, where: [grass, sand, path, water,  
802     lava], type: material}  
803     table: {uses: {wood: 2}, where: [grass, sand, path], type:  
804     material}  
805     furnace: {uses: {iron: 4}, where: [grass, sand, path], type:  
806     material}  
807     plant: {uses: {sapling: 1}, where: [grass, sand, path, water,  
808     lava, stone, coal, iron, diamond], type: object}
```

811 **Crafting** Regarding crafting achievements, we assume that the names of items often reflect their  
812 materials. Thus, we do not alter the raw materials used for tools. Based on the ignitability of the  
813 material, we only consider whether a table or furnace is required. For items that are ignitable, both a  
814 table and a furnace are required, whereas for non-flammable items, a table suffices.

815 Here is the Crafter setting for placing achievements:

```
816 make:  
817     wood_pickaxe: {uses: {wood: 1}, nearby: [table], gives: 1}  
818     stone_pickaxe: {uses: {wood: 1, stone: 1}, nearby: [table],  
819     gives: 1}  
820     iron_pickaxe: {uses: {wood: 1, coal: 1, iron: 1}, nearby: [  
821     table, furnace], gives: 1}
```

```

823 wood_sword: {uses: {wood: 1}, nearby: [table], gives: 1}
824 stone_sword: {uses: {wood: 1, stone: 1}, nearby: [table],
825 gives: 1}
826 iron_sword: {uses: {wood: 1, coal: 1, iron: 1}, nearby: [table
827 , furnace], gives: 1}
828

```

829 Here is one example of modified crafting tasks:

```

830 ignitability:
831   wood: true
832   coal: true
833   iron: false
834   diamond: true
835   stone: false
836 make:
837   wood_pickaxe: {uses: {wood: 1}, nearby: [table, furnace],
838 gives: 1}
839   stone_pickaxe: {uses: {wood: 1, stone: 1}, nearby: [table,
840 furnace], gives: 1}
841   iron_pickaxe: {uses: {wood: 1, coal: 1, iron: 1}, nearby: [
842 table, furnace], gives: 1}
843   wood_sword: {uses: {wood: 1}, nearby: [table, furnace], gives:
844 1}
845   stone_sword: {uses: {wood: 1, stone: 1}, nearby: [table,
846 furnace], gives: 1}
847   iron_sword: {uses: {wood: 1, coal: 1, iron: 1}, nearby: [table
848 , furnace], gives: 1}
849
850

```

## 851 B Pipeline of Skill Library

852 In this section, we introduce the revised pipeline of **Skill Library**. Based on JARVIS-1 and Voy-  
853 ager [Wang et al., 2023a,b], we further simplify the framework to adapt to our environment. Specifi-  
854 cally, given the agent’s observation (location, inventory, nearby blocks) and task list, we prompt the  
855 LLM as a *task proposer* to select a feasible and novel task. Then, the LLM-based *planner* decomposes  
856 this high-level task into a sequence of subgoals. The LLM-based *controller* executes these subgoals  
857 sequentially by outputting available actions (e.g., move left, place table). However, if the controller  
858 outputs “failed” or believes it “succeeded” but the task cannot be accomplished (as indicated by the  
859 environment’s feedback), it suggests that the initial plan provided by the planner may contain errors  
860 or that the controller experienced execution failures. Then, the *explainer* tries to identify the errors  
861 and re-plan the current task. For successful plans, we store in the skill library along with the task and  
862 the agent situation for future reuse in similar situations. Here, task proposer, planner, explainer, and  
863 controller are fulfilled by the LLMs.

## 864 C More results of DreamerV3

865 We further test Mars using the model trained in Crafter. The results are shown in Table 4. From the  
866 results, we observe that DreamerV3 performs well in Default (the same world as training). However,  
867 when adapting to a new world that includes partial counter-commonsense elements, the performance  
868 drops significantly. These results indicate that the state-of-the-art RL-based method DreamerV3  
869 struggles to quickly adapt to environments with even minor differences (e.g., the “Terrain” world  
870 achieves a reward of only 5.3), demonstrating that it does not solve the situated inductive reasoning  
871 problem.

Table 4: Results of worlds in Mars using DreamerV3 trained in Crafter.

|           | Default        | Terrain       | Survival      | Task. Dep     | Terr. Surv.   | Terr. Task.   | Surv. Task    | All three.    |
|-----------|----------------|---------------|---------------|---------------|---------------|---------------|---------------|---------------|
| Reward    | $11.5 \pm 1.6$ | $5.3 \pm 3.4$ | $6.4 \pm 4.4$ | $3.0 \pm 2.1$ | $3.8 \pm 2.6$ | $3.5 \pm 0.9$ | $2.2 \pm 2.0$ | $1.2 \pm 1.3$ |
| Score (%) | $14.2 \pm 1.3$ | $6.8 \pm 2.8$ | $8.7 \pm 4.6$ | $3.4 \pm 1.3$ | $3.8 \pm 0.1$ | $2.4 \pm 0.4$ | $2.3 \pm 2.1$ | $1.1 \pm 0.5$ |

## D Failure cases of Skill Library

Skill Library’s memory only involves successful subgoal sequences, making it difficult to be aware of the real situation for task completion. Consequently, the incorrect path will be reused repetitively. For example, for the task “place table”, if the planner outputs “step1: mine tree; step2: place table” and the LLM-based controller accidentally mines grass and obtains wood, the Skill Library will save the incorrect plan for “place table”. This reuse of erroneous plans significantly reduces the model’s exploration efficiency.

Here are the plans extracted from Skill Library, which is from “Task. Dep” modified world:

```
skill library:
"collect_wood": [
{ "init_inventory": {},
"table_in_view": false,
"furnace_in_view": false,
"plan": [
"explore("right", 2) # explore to the right to find a tree",
"mine("tree", 1) # mine the tree block to get wood"
]
},
{
"init_inventory": {},
"table_in_view": false,
"furnace_in_view": false,
"plan": [
"mine("tree", 1) # mine the tree block to get wood",
"make("wood sword") # craft a wood sword to attack the cow"
]
}
]
```

In fact, collecting wood is achieved by mining grass. However, from the example, we can observe the plans extracted from Skill Library is consistent with the default Crafter world. We can infer that the controller unintentionally mined grass and obtained wood, and the Skill Library mechanically saved this plan instead of truly learning the “mining grass yields wood” rule.

## E Examples of induced rules

```
Induced rules:
1. Interacting with water blocks replenishes the player’s drink status.
2. Standing on the iron can increase the player’s health.
3. The player can use the table and wood to craft a wood pickaxe.
4. The player can move left on the path.
5. ....
```

## F Compute Resource Details

For running all experiments, we use the hardware resources as listed in Table 5.

Table 5: Compute Resource Details

| CPU                      | GPT                    | RAM  |
|--------------------------|------------------------|------|
| AMD Ryzen 9 5950X@3.4GHz | Nvidia RTX 3090 (24GB) | 64GB |
| AMD EPYC 7642@2.3GHz     | Nvidia A100 (40GB)     | 1.0T |

## 889 G Licenses

890 In our code, we have used the following libraries which are covered by the corresponding licenses:

- 891 • Crafter (MIT license)
- 892 • OpenAI GPT (CC BY-NC-SA 4.0 license)
- 893 • Stable Baselines3 (MIT license)
- 894 • DreamerV3 (MIT License)



## 895 H Prompt

### 896 H.1 ReAct

**Instruction:** You are playing a new [counter-commonsense] game, where some game mechanics are different from Minecraft. Please unlock as many achievements as possible while ensuring your survival.

Available actions are < move\_left, move\_right, move\_up, move\_down, do, sleep, place\_stone, place\_table, place\_furnace, place\_plant, make\_wood\_pickaxe, make\_stone\_pickaxe, make\_iron\_pickaxe, make\_wood\_sword, make\_stone\_sword, make\_iron\_sword >, where 'do' means to interact the block at front of the player, including mine the block, attack the creature, and drink.

Unlock the following achievements < Collect Coal, Collect Diamond, Collect Drink, Collect Iron, Collect Sapling, Collect Stone, Collect Wood, kill Skeleton, kill Zombie, kill Cow, Eat Plant, Make Iron Pickaxe, Make Iron Sword, Make Stone Pickaxe, Make Stone Sword, Make Wood Pickaxe, Make Wood Sword, Place Furnace, Place Plant, Place Stone, Place Table, Wake Up >

I will give you in-game observations:

You are on: ...

You see (objects with coordinates): ...

Your status (xx/9):

- health higher than 6 means you're healthy;
- food higher than 6 means you're not hungry;
- drink higher than 6 means you're not thirsty;
- energy higher than 6 means you're not fatigued.

Your inventory (xx/9): ...

You should then respond to me with Thought or Action. You must follow the following criteria:

- 1) Act as a mentor and guide me on what to do based on my current progress. Do not ask questions or give unmeaningful answers.
- 2) Ensure your survival, including maintaining health, food, drink, and energy levels.
- 3) The next task should not be too hard since you may not have the necessary resources or have learned enough skills to complete it yet.
- 4) When necessary items are not around, explore the map extensively. You should not be doing the same thing over and over again.
- 5) You may sometimes need to repeat some tasks if you need to collect more resources to complete more difficult tasks. Only repeat tasks if necessary.
- 6) You should choose available and feasible action.
- 7) Sleep until the energy is full; you will wake up automatically..
- 8) When you need to craft tools with table or furnace, if there is table or furnace in the view, please move your position to not more than 2 steps away from it.
- 9) If both a table and furnace are needed, place them together.

If you respond with Thought, you should only respond in the format: THINK: ...

If you respond with Action, you should only respond in the format: ACTION: ...

897

## 898 H.2 Reflexion

**Instruction:** You are a good analyst of a new [counter-commonsense] game, where some game mechanics are different from Minecraft.

Available actions are < move\_left, move\_right, move\_up, move\_down, do, sleep, place\_stone, place\_table, place\_furnace, place\_plant, make\_wood\_pickaxe, make\_stone\_pickaxe, make\_iron\_pickaxe, make\_wood\_sword, make\_stone\_sword, make\_iron\_sword >, where 'do' means to interact the block at front of the player, including mine the block, attack the creature, and drink.

You will be provided with the history of past experiences, including each step's action, reward, score, observations, status information, inventory of the player.

When you reflect, you must follow the following criteria:

- 1) Determine the tasks the player is trying to accomplish.
- 2) If the player successfully accomplished the task, extract key learnings and skills; if unsuccessful, provide an explanation of the execution failure according to the current inventory information of the agent and adapt the plan.
- 3) Analyze changes in rewards and scores: rewards indicate the player's health status and task achievements; scores indicate task diversity. Your goal is to maximize both rewards and scores.

You should only respond in the format: REFLECTION: ...

*{history trajectory}*

reward: *{reward}*

score: *{score}*

899

## 900 H.3 Skill library

### 901 H.3.1 Task proposer

**Instruction:** You are a helpful assistant trying to play a new [counter-commonsense] 2D game, where some game mechanics are different from Minecraft. Please choose the next task from the task pool to do in the new game. Your ultimate goal is to discover as many diverse things as possible, accomplish as many diverse tasks as possible while ensuring survival, and become the best player in the world.

Task pool: [collect coal, collect diamond, collect drink, collect iron, collect sapling, collect stone, collect wood, kill skeleton, kill zombie, kill cow, eat plant, make iron pickaxe, make iron sword, make stone pickaxe, make stone sword, make wood pickaxe, make wood sword, place furnace, place plant, place stone, place table, wake up]

I will give you the following information:

Player's in-game observation: including the player's status, nearby blocks, and the inventory.

Completed tasks so far: ...

Failed tasks: ... Based on this information, you should propose the next task for the player to do. Follow the criteria below: 1) The task should be diverse and challenging, but not too hard. It should be something that the player can accomplish in the next few steps.

2) You may sometimes need to repeat some tasks if you need to collect more resources to complete more difficult tasks. Only repeat tasks if necessary.

3) The task should be related to the player's current status, nearby blocks, and inventory.

You should only respond in the format described below: RESPONSE FORMAT:

Reasoning: Based on the information I listed above, do reasoning about what the next task should be.

Task: The next task.

Here are some examples: *{examples}*

902

### 903 H.3.2 Task planner

**Instruction:** You are a helper agent in a new [counter-commonsense] 2D game, where some mechanics are different from Minecraft. Based on your current inventory and observations, you need to generate sequences of subgoals for a certain task. Please refer to the history dialogue to give the plan consisting of templates. Do not explain or give any other instructions.

You must follow the criteria below:

- 1) You should only mine [stone, coal, iron, tree, diamond, water, lava, grass, sand, ripe-plant] blocks.
- 2) You should only attack movable creatures.
- 3) You should only place [stone, table, furnace, sapling] blocks.
- 4) You should only craft [wood pickaxe, stone pickaxe, iron pickaxe, wood sword, stone sword, iron sword] tools.
- 5) You should choose available subgoals to complete the task.
- 6) You are probably provided some past successful plans to refer to.
- 8) Not all creatures are friendly. When you are attacked, please attack back.
- 9) You should only perform the subgoals that are feasible based on the current inventory and observations.
- 10) This is a 2D game, so when you encounter an obstacle, you should mine it or place a block to build a "path" or make a detour.

Here are some subgoals for reference:

mine(block\_name, amount) # mine a specified amount of blocks of the block\_name.  
attack(creature, amount) # attack the specified number of creatures that can move. Creatures include zombies, skeletons, cows, etc.  
sleep(); # put the player to sleep.  
place(block\_name); # place the block. Note that you do not need to craft tables and furnaces; you can place them directly.  
make(tool\_name); # craft a tool.  
explore(direction, steps); # the player explores in the specified direction for the given steps.

Here are some examples: *{examples}*

904

### 905 H.3.3 Explainer

**Instruction:** You are a helpful assistant trying to play a new [counter-commonsense] 2D game, where some mechanics are different from Minecraft. Here are some actions that the agent fails to perform in the game. Please give an explanation of action execution failure according to the current inventory information of the agent and history dialogue.

You must follow the criteria below:

- 1) You should only mine [stone, coal, iron, tree, diamond, water, lava, grass, sand, ripe-plant] blocks.
- 2) You should only attack movable creatures.
- 3) You should only place [stone, table, furnace, sapling] blocks.
- 4) You should only craft [wood pickaxe, stone pickaxe, iron pickaxe, wood sword, stone sword, iron sword] tools.
- 5) Not all creatures are friendly. When you are attacked, please attack back.
- 6) This is a 2D game, so when you encounter an obstacle, you should mine it or place a block to build a "path" or make a detour.
- 7) In the new game, it is possible that some tasks or creatures are different from Minecraft. For example, you may need some tools to mine a tree block. Thus, when you attempt to accomplish a task multiple times but fail, please try to explore more counter-commonsense knowledge.

Here are some examples: *{examples}*

906

### 907 H.3.4 Replanner

**Instruction:** Please fix the above errors and replan the task [{task}]

908

### 909 H.3.5 Controller

**Instruction:** You are a helpful assistant trying to play a new [counter-commonsense] 2D game, where some mechanics are different from Minecraft. Given the current observation and the goal, you need to generate the action to complete the goal. You can only perform the following actions:

Available actions are < move\_left, move\_right, move\_up, move\_down, do, sleep, place\_stone, place\_table, place\_furnace, place\_plant, make\_wood\_pickaxe, make\_stone\_pickaxe, make\_iron\_pickaxe, make\_wood\_sword, make\_stone\_sword, make\_iron\_sword >, where 'do' means to interact with the block in front of the player, including mining the block, attacking creatures, and drinking; "SUCCEED" means that the goal is achieved; "FAILED" means that it is too hard to achieve the goal.

You should follow the criteria below:

- 1) When the desired item is not immediately visible, it is essential to explore the surroundings to locate it. You can move strategically in the direction where the item is likely to be found.
- 2) Not all creatures are friendly. When you are attacked, please attack back.
- 3) When you need to craft tools with a table or furnace, if there is a table or furnace in view, move your position to not more than 2 steps away from it.
- 4) When a table and furnace are needed simultaneously, place them together and place them on proper terrain.
- 5) This is a 2D game, so when you encounter an obstacle, you should mine it or place a block to build a "path" or find a detour.
- 6) When you mine a block, attack a creature, or drink, you must face the block.
- 7) If you move left, your x-coordinate will decrease by 1; if you move right, your x-coordinate will increase by 1; if you move up, your y-coordinate will increase by 1; if you move down, your y-coordinate will decrease by 1.

You should only respond in the format described below:

RESPONSE FORMAT:

Reasoning: Based on the information I listed above and history dialogue, do reasoning about how to achieve the goal.

Action: The next action.

Here some examples: {examples}

subgoal: {subgoal}

910

### 911 H.4 Induction from Reflection

**Instruction:** You are a helpful assistant with inductive reasoning. Given the history trajectory, including actions and observations, you need to reflect on the action execution results and determine the possible mechanism of the new game. The mechanism should be consistent with the game rules and the player's inventory information.

You should only respond in the format described below:

RESPONSE FORMAT:

Reasoning: Based on the information I listed above and history dialogue, do reasoning about the mechanism of the new game.

Mechanism: The mechanism of the new game.

Here are some examples: {examples}

{history trajectory}

912

## 913 I Configurations of seven worlds in Mars

### 914 I.1 Terrain

915 The world “Terrain” only changes the terrain distribution element.

```
916 terrain_neighbour:
917     coal: grass
918     iron: sand
919     diamond: stone
920     lava: stone
921     tree: path
922     player: sand
923     water: stone
924
925
```

### 926 I.2 Survival

927 The world “Survival” only changes the survival setting.

```
928 npc_objects:
929     cow:
930         eatable: false
931         defeatable: true
932         arrowable: true
933         closable: false
934         can_walk: true
935         closable_health_damage_func: 0
936         attackable: true
937         eat_health_damage_func: 0
938         inc_food_func: 0
939         inc_thirst_func: 0
940         arrow_damage_func: -1
941     zombie:
942         eatable: true
943         defeatable: false
944         arrowable: false
945         closable: true
946         can_walk: true
947         closable_health_damage_func: 0
948         attackable: true
949         eat_health_damage_func: 1
950         inc_food_func: 1
951         inc_thirst_func: 1
952         arrow_damage_func: 0
953     skeleton:
954         eatable: true
955         defeatable: false
956         arrowable: false
957         closable: false
958         can_walk: true
959         closable_health_damage_func: 0
960         attackable: false
961         eat_health_damage_func: -1
962         inc_food_func: -1
963         inc_thirst_func: -1
964         arrow_damage_func: 0
965     plant:
966         eatable: true
967         defeatable: false
968
```



```

969     arrowable: false
970     closable: false
971     can_walk: true
972     closable_health_damage_func: 0
973     attackable: false
974     eat_health_damage_func: 0
975     inc_food_func: 1
976     inc_thirst_func: 1
977     arrow_damage_func: 0
978 drink:
979     water:
980         inc_drink_func: 1
981         inc_damage_func: -1
982         inc_food_func: 0
983     lava:
984         inc_drink_func: -1
985         inc_damage_func: -1
986         inc_food_func: 1
987

```

### 988 I.3 Task. Dep

989 The world “Task. Dep” only changes the task dependency element.

```

990
991 ignitability:
992     wood: true
993     coal: true
994     iron: false
995     diamond: true
996     stone: false
997 collect:
998     tree: {require: {iron_pickaxe: 1}, receive: {stone: 1}, leaves:
999         {material: grass, object: null}}
1000     stone: {require: {}, receive: {diamond: 1}, leaves: {material:
1001         grass, object: null}}
1002     coal: {require: {wood_pickaxe: 1}, receive: {iron: 1}, leaves: {
1003         material: path, object: null}}
1004     iron: {require: {stone_pickaxe: 1}, receive: {sapling: {amount:
1005         1, probability: 0.1}}, leaves: {material: path, object: null}}
1006     diamond: {require: {}, receive: {coal: 1}, leaves: {material:
1007         path, object: null}}
1008     water: {require: {}, receive: {drink: 1}, leaves: {material:
1009         water, object: {zombie: 0.1}}}
1010     lava: {require: {}, receive: {drink: 1}, leaves: {material: lava
1011         , object: null}}
1012     grass: {require: {}, receive: {wood: 1}, leaves: {material:
1013         grass, object: null}}
1014     sand: {require: {}, receive: {}, leaves: {material: sand, object
1015         : null}}
1016 place:
1017     stone: {uses: {stone: 1}, where: [grass, sand, path, water, lava
1018         ], type: material}
1019     table: {uses: {diamond: 2}, where: [grass, sand, path], type:
1020         material}
1021     furnace: {uses: {iron: 4}, where: [grass, sand, path], type:
1022         material}
1023     plant: {uses: {sapling: 1}, where: [grass, sand, path, water,
1024         lava, stone, coal, iron, diamond], type: object}
1025 make:
1026     wood_pickaxe: {uses: {wood: 1}, nearby: [table], gives: 1}

```

```

1027 stone_pickaxe: {uses: {wood: 1, stone: 1}, nearby: [table,
1028 furnace], gives: 1}
1029 iron_pickaxe: {uses: {wood: 1, coal: 1, iron: 1}, nearby: [table
1030 ], gives: 1}
1031 wood_sword: {uses: {wood: 1}, nearby: [table], gives: 1}
1032 stone_sword: {uses: {wood: 1, stone: 1}, nearby: [table, furnace
1033 ], gives: 1}
1034 iron_sword: {uses: {wood: 1, coal: 1, iron: 1}, nearby: [table],
1035 gives: 1}
1036

```

#### 1037 **L4 Terr. Surv.**

1038 The world “Terr. Surv.” involves changing the terrain and survival setting.

```

1039 terrain_neighbour:
1040   coal: water
1041   iron: sand
1042   diamond: stone
1043   lava: grass
1044   tree: path
1045   player: path
1046   water: sand
1047 walkable_effect:
1048   stone: {walkable: true, walk_health: 0, dieable: false}
1049   diamond: {walkable: false, walk_health: 0, dieable: false}
1050   coal: {walkable: true, walk_health: 0, dieable: true}
1051   iron: {walkable: false, walk_health: 0, dieable: false}
1052   water: {walkable: true, walk_health: 1, dieable: false}
1053   lava: {walkable: false, walk_health: 0, dieable: false}
1054   grass: {walkable: false, walk_health: 0, dieable: false}
1055   path: {walkable: true, walk_health: 0, dieable: false}
1056   sand: {walkable: true, walk_health: 1, dieable: false}
1057   tree: {walkable: false, walk_health: 0, dieable: false}
1058 npc_objects:
1059   cow:
1060     eatable: true
1061     defeatable: false
1062     attackable: true
1063     arrowable: false
1064     closable: false
1065     can_walk: true
1066     closable_health_damage_func: -1
1067     eat_health_damage_func: 0
1068     arrow_damage_func: 0
1069     inc_food_func: 0
1070     inc_thirst_func: 1
1071   zombie:
1072     eatable: true
1073     defeatable: false
1074     attackable: true
1075     arrowable: false
1076     closable: false
1077     can_walk: true
1078     closable_health_damage_func: 1
1079     eat_health_damage_func: 0
1080     arrow_damage_func: 0
1081     inc_food_func: 1
1082     inc_thirst_func: 0
1083   skeleton:
1084

```

```

1085     eatable: true
1086     defeatable: false
1087     attackable: true
1088     arrowable: true
1089     closable: true
1090     can_walk: true
1091     closable_health_damage_func: -1
1092     eat_health_damage_func: -1
1093     arrow_damage_func: 1
1094     inc_food_func: 0
1095     inc_thirst_func: 0
1096   plant:
1097     eatable: false
1098     defeatable: true
1099     attackable: false
1100     arrowable: true
1101     closable: false
1102     can_walk: false
1103     closable_health_damage_func: -1
1104     eat_health_damage_func: 0
1105     arrow_damage_func: 0
1106     inc_food_func: 0
1107     inc_thirst_func: 0
1108   drink:
1109     lava:
1110       inc_drink_func: 1
1111       inc_damage_func: 1
1112       inc_food_func: -1
1113     water:
1114       inc_drink_func: -1
1115       inc_damage_func: -1
1116       inc_food_func: 1

```

## 1118 I.5 Terr. Task.

1119 The world “Terr. Task.” involves changing the terrain and task dependency.

```

1120   terrain_neighbour:
1121     coal: path
1122     iron: path
1123     diamond: grass
1124     lava: path
1125     tree: stone
1126     player: path
1127     water: sand
1128   walkable_effect:
1129     stone: {walkable: true, walk_health: 0, dieable: false}
1130     diamond: {walkable: false, walk_health: 0, dieable: false}
1131     coal: {walkable: false, walk_health: 0, dieable: false}
1132     iron: {walkable: true, walk_health: 1, dieable: false}
1133     water: {walkable: true, walk_health: -1, dieable: false}
1134     lava: {walkable: false, walk_health: 0, dieable: false}
1135     grass: {walkable: true, walk_health: 1, dieable: false}
1136     path: {walkable: true, walk_health: 0, dieable: false}
1137     sand: {walkable: true, walk_health: 0, dieable: false}
1138     tree: {walkable: false, walk_health: 0, dieable: false}
1139   ignitability:
1140     wood: false
1141     coal: false

```

```

1143     iron: true
1144     diamond: false
1145     stone: true
1146 collect:
1147     tree: {require: {}, receive: {coal: 1}, leaves: {material: path,
1148         object: null}}
1149     stone: {require: {}, receive: {stone: {amount: 1, probability:
1150         0.5}, wood: {amount: 1, probability: 0.5}}, leaves: {material:
1151         diamond, object: null}}
1152     coal: {require: {wood_pickaxe: 1}, receive: {coal: 1}, leaves: {
1153         material: lava, object: null}}
1154     iron: {require: {stone_pickaxe: 1}, receive: {iron: 1}, leaves:
1155         {material: lava, object: null}}
1156     diamond: {require: {stone_pickaxe: 1}, receive: {diamond: 1},
1157         leaves: {material: water, object: null}}
1158     water: {require: {}, receive: {drink: 1}, leaves: {material:
1159         water, object: {skeleton: 0.1}}}
1160     lava: {require: {sapling: 1}, receive: {drink: 1}, leaves: {
1161         material: stone, object: {}}}
1162     grass: {require: {wood_pickaxe: 1}, receive: {sapling: {amount:
1163         1, probability: 0.1}}, leaves: {material: grass, object: null}}
1164     sand: {require: {iron_pickaxe: 1}, receive: {coal: 1}, leaves: {
1165         material: lava, object: None}}
1166 place:
1167     stone: {uses: {stone: 1}, where: [grass, sand, path, water, lava
1168         ], type: material}
1169     table: {uses: {stone: 4}, where: [grass, sand, path], type:
1170         material}
1171     furnace: {uses: {coal: 4}, where: [grass, sand, path], type:
1172         material}
1173     plant: {uses: {sapling: 1}, where: [grass, sand, path, water,
1174         lava, stone, coal, iron, diamond], type: object}
1175 make:
1176     wood_pickaxe: {uses: {wood: 1}, nearby: [table], gives: 1}
1177     stone_pickaxe: {uses: {wood: 1, stone: 1}, nearby: [table,
1178         furnace], gives: 1}
1179     iron_pickaxe: {uses: {wood: 1, coal: 1, iron: 1}, nearby: [table
1180         ], gives: 1}
1181     wood_sword: {uses: {wood: 1}, nearby: [table], gives: 1}
1182     stone_sword: {uses: {wood: 1, stone: 1}, nearby: [table, furnace
1183         ], gives: 1}
1184     iron_sword: {uses: {wood: 1, coal: 1, iron: 1}, nearby: [table],
1185         gives: 1}

```

## 1187 I.6 Surv. Task

1188 The world “Surv. Task.” involves changing the survival setting and task dependency.

```

1189 npc_objects:
1190     cow:
1191         eatable: true
1192         defeatable: false
1193         arrowable: false
1194         closable: true
1195         can_walk: true
1196         closable_health_damage_func: -1
1197         attackable: true
1198         eat_health_damage_func: 1
1199         inc_food_func: 1
1200

```

```

1201     inc_thirst_func: 1
1202     arrow_damage_func: 0
1203 zombie:
1204     eatable: false
1205     defeatable: true
1206     arrowable: false
1207     closable: false
1208     can_walk: true
1209     closable_health_damage_func: -1
1210     attackable: true
1211     eat_health_damage_func: 0
1212     inc_food_func: 0
1213     inc_thirst_func: 0
1214     arrow_damage_func: 0
1215 skeleton:
1216     eatable: false
1217     defeatable: true
1218     arrowable: false
1219     closable: true
1220     can_walk: true
1221     closable_health_damage_func: 0
1222     attackable: false
1223     eat_health_damage_func: 0
1224     inc_food_func: 0
1225     inc_thirst_func: 0
1226     arrow_damage_func: 0
1227 plant:
1228     eatable: true
1229     defeatable: false
1230     arrowable: true
1231     closable: false
1232     can_walk: true
1233     closable_health_damage_func: 0
1234     attackable: false
1235     eat_health_damage_func: 1
1236     inc_food_func: 1
1237     inc_thirst_func: -1
1238     arrow_damage_func: 1
1239 drink:
1240     lava:
1241         inc_drink_func: 1
1242         inc_damage_func: -1
1243         inc_food_func: 1
1244     water:
1245         inc_drink_func: -1
1246         inc_damage_func: 1
1247         inc_food_func: 1
1248 ignitability:
1249     wood: false
1250     coal: true
1251     iron: true
1252     diamond: true
1253     stone: false
1254 collect:
1255     tree: {require: {}, receive: {wood: {amount: 1, probability:
1256 0.5}, diamond: {amount: 1, probability: 0.5}}, leaves: {material
1257 : coal, object: null}}
1258     stone: {require: {}, receive: {stone: 1}, leaves: {material:
1259 path, object: null}}

```

```

1260 coal: {require: {}, receive: {coal: 1}, leaves: {material: water
1261 , object: null}}
1262 iron: {require: {stone_pickaxe: 1}, receive: {iron: 1}, leaves:
1263 {material: water, object: null}}
1264 diamond: {require: {iron_pickaxe: 1}, receive: {diamond: 1},
1265 leaves: {material: diamond, object: null}}
1266 water: {require: {sapling: 1}, receive: {drink: 1}, leaves: {
1267 material: lava, object: {skeleton: 0.1}}}
1268 lava: {require: {sapling: 1}, receive: {drink: 1}, leaves: {
1269 material: water, object: {zombie: 0.1}}}
1270 grass: {require: {wood_pickaxe: 1}, receive: {sapling: {amount:
1271 1, probability: 0.1}}, leaves: {material: iron, object: null}}
1272 sand: {require: {}, receive: {sapling: 1}, leaves: {material:
1273 coal, object: {skeleton: 0.1}}}
1274 place:
1275 stone: {uses: {stone: 1}, where: [grass, sand, path, water, lava
1276 ], type: material}
1277 table: {uses: {coal: 4}, where: [grass, sand, path], type:
1278 material}
1279 furnace: {uses: {stone: 4}, where: [grass, sand, path], type:
1280 material}
1281 plant: {uses: {sapling: 1}, where: [grass, sand, path, water,
1282 lava, stone, coal, iron, diamond], type: object}
1283 make:
1284 wood_pickaxe: {uses: {wood: 1}, nearby: [table], gives: 1}
1285 stone_pickaxe: {uses: {wood: 1, stone: 1}, nearby: [table],
1286 gives: 1}
1287 iron_pickaxe: {uses: {wood: 1, coal: 1, iron: 1}, nearby: [table
1288 , furnace], gives: 1}
1289 wood_sword: {uses: {wood: 1}, nearby: [table], gives: 1}
1290 stone_sword: {uses: {wood: 1, stone: 1}, nearby: [table], gives:
1291 1}
1292 iron_sword: {uses: {wood: 1, coal: 1, iron: 1}, nearby: [table,
1293 furnace], gives: 1}

```

## 1295 **I.7 All. three (changed)**

1296 The world “All. three (changed)” involves changing terrain, survival setting and task dependency.

```

1297 terrain_neighbour:
1298 coal: stone
1299 iron: path
1300 diamond: sand
1301 lava: grass
1302 tree: grass
1303 player: diamond
1304 water: iron
1305 walkable_effect:
1306 stone: {walkable: true, walk_health: 0, dieable: false}
1307 diamond: {walkable: true, walk_health: 0, dieable: false}
1308 coal: {walkable: false, walk_health: 0, dieable: false}
1309 iron: {walkable: true, walk_health: 0, dieable: false}
1310 water: {walkable: true, walk_health: 0, dieable: true}
1311 lava: {walkable: false, walk_health: 0, dieable: false}
1312 grass: {walkable: true, walk_health: 0, dieable: false}
1313 path: {walkable: false, walk_health: 0, dieable: false}
1314 sand: {walkable: true, walk_health: -1, dieable: false}
1315 tree: {walkable: false, walk_health: 0, dieable: false}
1316 npc_objects:

```

```

1318     cow:
1319         eatable: false
1320         defeatable: true
1321         attackable: false
1322         arrowable: true
1323         closable: false
1324         can_walk: false
1325         closable_health_damage_func: 0
1326         eat_health_damage_func: 0
1327         arrow_damage_func: -1
1328         inc_food_func: 0
1329         inc_thirst_func: 0
1330     zombie:
1331         eatable: true
1332         defeatable: false
1333         attackable: true
1334         arrowable: false
1335         closable: false
1336         can_walk: false
1337         closable_health_damage_func: 1
1338         eat_health_damage_func: 0
1339         arrow_damage_func: 0
1340         inc_food_func: 1
1341         inc_thirst_func: -1
1342     skeleton:
1343         eatable: false
1344         defeatable: true
1345         attackable: false
1346         arrowable: false
1347         closable: false
1348         can_walk: false
1349         closable_health_damage_func: 0
1350         eat_health_damage_func: 0
1351         arrow_damage_func: 0
1352         inc_food_func: 0
1353         inc_thirst_func: 0
1354     plant:
1355         eatable: true
1356         defeatable: false
1357         attackable: true
1358         arrowable: false
1359         closable: false
1360         can_walk: false
1361         closable_health_damage_func: -1
1362         eat_health_damage_func: 1
1363         arrow_damage_func: 0
1364         inc_food_func: -1
1365         inc_thirst_func: 1
1366     drink:
1367         lava:
1368             inc_drink_func: 1
1369             inc_damage_func: 0
1370             inc_food_func: 1
1371         water:
1372             inc_drink_func: 1
1373             inc_damage_func: 0
1374             inc_food_func: -1
1375     ignitability:
1376         wood: true

```

```

1377     coal: false
1378     iron: false
1379     diamond: false
1380     stone: true
1381 collect:
1382     tree: {require: {iron_pickaxe: 1}, receive: {iron: 1}, leaves: {
1383     material: path, object: null}}
1384     stone: {require: {}, receive: {wood: {amount: 1, probability:
1385     0.5}, stone: {amount: 1, probability: 0.5}}, leaves: {material:
1386     sand, object: null}}
1387     coal: {require: {wood_pickaxe: 1}, receive: {coal: 1}, leaves: {
1388     material: stone, object: null}}
1389     iron: {require: {}, receive: {iron: 1}, leaves: {material: tree,
1390     object: null}}
1391     diamond: {require: {stone_pickaxe: 1}, receive: {diamond: 1},
1392     leaves: {material: stone, object: null}}
1393     water: {require: {sapling: 1}, receive: {drink: 1}, leaves: {
1394     material: tree, object: {}}}
1395     lava: {require: {}, receive: {drink: 1}, leaves: {material: lava
1396     , object: {skeleton: 0.1}}}
1397     grass: {require: {wood_pickaxe: 1}, receive: {sapling: {amount:
1398     1, probability: 0.1}}, leaves: {material: stone, object: null}}
1399     sand: {require: {wood_pickaxe: 1}, receive: {sapling: 1}, leaves
1400     : {material: lava, object: {cow: 0.1}}}
1401 place:
1402     stone: {uses: {stone: 1}, where: [grass, sand, path, water, lava
1403     ], type: material}
1404     table: {uses: {wood: 2}, where: [grass, sand, path], type:
1405     material}
1406     furnace: {uses: {iron: 4}, where: [grass, sand, path], type:
1407     material}
1408     plant: {uses: {sapling: 1}, where: [grass, sand, path, water,
1409     lava, stone, coal, iron, diamond], type: object}
1410 make:
1411     wood_pickaxe: {uses: {wood: 1}, nearby: [table, furnace], gives:
1412     1}
1413     stone_pickaxe: {uses: {wood: 1, stone: 1}, nearby: [table],
1414     gives: 1}
1415     iron_pickaxe: {uses: {wood: 1, coal: 1, iron: 1}, nearby: [table
1416     ], gives: 1}
1417     wood_sword: {uses: {wood: 1}, nearby: [table, furnace], gives:
1418     1}
1419     stone_sword: {uses: {wood: 1, stone: 1}, nearby: [table], gives:
1420     1}
1421     iron_sword: {uses: {wood: 1, coal: 1, iron: 1}, nearby: [table],
1422     gives: 1}
1423

```
